# Supplementary material for: Magnetism, structures and stabilities of cluster assembled TM@Si nanotubes (TM = Cr, Mn and Fe): a density functional study
Source: Royal Society of Chemistry journal article supplement (doi:10.1039/c6dt01252c), 2016-01-01
Supplement: c6dt01252c1.pdf [file c6dt01252c1.pdf]

**Supplementary information:**

**Table 1a.** On site magnetic moments of TM doping in Type 1 finite SiNT's.

| TM-atoms              | <b>n=1 (in <math>\mu_B</math>)</b> |                     | <b>n=2 (in <math>\mu_B</math>)</b> |                     | <b>n=3 (in <math>\mu_B</math>)</b> |                     | <b>n=4 (in <math>\mu_B</math>)</b> |                     |
|-----------------------|------------------------------------|---------------------|------------------------------------|---------------------|------------------------------------|---------------------|------------------------------------|---------------------|
|                       | $Cr_nSi_{12n}$                     | $Cr_{2n-1}Si_{12n}$ | $Cr_nSi_{12n}$                     | $Cr_{2n-1}Si_{12n}$ | $Cr_nSi_{12n}$                     | $Cr_{2n-1}Si_{12n}$ | $Cr_nSi_{12n}$                     | $Cr_{2n-1}Si_{12n}$ |
| <b>1<sup>st</sup></b> | 0                                  | 0                   | 2.141                              | 1.227               | -1.712                             | 0                   | -1.596                             | 0                   |
| <b>2<sup>nd</sup></b> |                                    |                     | 2.230                              | -0.125              | 2.493                              | 0                   | 2.794                              | 0                   |
| <b>3<sup>rd</sup></b> |                                    |                     |                                    | 1.337               | 1.505                              | 0                   | 2.970                              | 0                   |
| <b>4<sup>th</sup></b> |                                    |                     |                                    |                     |                                    | 0                   | -2.053                             | 0                   |
| <b>5<sup>th</sup></b> |                                    |                     |                                    |                     |                                    | 0                   |                                    | 0                   |
| <b>6<sup>th</sup></b> |                                    |                     |                                    |                     |                                    |                     |                                    | 0                   |
| <b>7<sup>th</sup></b> |                                    |                     |                                    |                     |                                    |                     |                                    | 0                   |
| <b>Total</b>          | <b>0</b>                           | <b>0</b>            | <b>6</b>                           | <b>4</b>            | <b>2</b>                           | <b>0</b>            | <b>2</b>                           | <b>0</b>            |
|                       | $Mn_nSi_{12n}$                     | $Mn_{2n-1}Si_{12n}$ | $Mn_nSi_{12n}$                     | $Mn_{2n-1}Si_{12n}$ | $Mn_nSi_{12n}$                     | $Mn_{2n-1}Si_{12n}$ | $Mn_nSi_{12n}$                     | $Mn_{2n-1}Si_{12n}$ |
| <b>1<sup>st</sup></b> | 1.526                              | 1.526               | -2.301                             | 0.477               | -1.898                             | -2.662              | -1.733                             | 0.102               |
| <b>2<sup>nd</sup></b> |                                    |                     | -2.302                             | -2.350              | 2.436                              | -0.275              | -1.989                             | 2.413               |
| <b>3<sup>rd</sup></b> |                                    |                     |                                    | -1.148              | -1.868                             | -2.101              | -2.097                             | 2.582               |
| <b>4<sup>th</sup></b> |                                    |                     |                                    |                     |                                    | -1.499              | -1.663                             | -0.030              |
| <b>5<sup>th</sup></b> |                                    |                     |                                    |                     |                                    | -2.026              |                                    | 1.852               |
| <b>6<sup>th</sup></b> |                                    |                     |                                    |                     |                                    |                     |                                    | 2.146               |
| <b>7<sup>th</sup></b> |                                    |                     |                                    |                     |                                    |                     |                                    | 2.363               |
| <b>Total</b>          | <b>1</b>                           | <b>1</b>            | <b>6</b>                           | <b>3</b>            | <b>1</b>                           | <b>9</b>            | <b>8</b>                           | <b>13</b>           |
|                       | $Fe_nSi_{12n}$                     | $Fe_{2n-1}Si_{12n}$ | $Fe_nSi_{12n}$                     | $Fe_{2n-1}Si_{12n}$ | $Fe_nSi_{12n}$                     | $Fe_{2n-1}Si_{12n}$ | $Fe_nSi_{12n}$                     | $Fe_{2n-1}Si_{12n}$ |
| <b>1<sup>st</sup></b> | 0                                  | 0                   | -1.733                             | -1.480              | 0.963                              | -2.125              | 1.222                              | -1.457              |
| <b>2<sup>nd</sup></b> |                                    |                     | -1.717                             | -1.499              | -1.293                             | -1.458              | -1.138                             | -2.016              |
| <b>3<sup>rd</sup></b> |                                    |                     |                                    | -2.586              | 0.921                              | -1.507              | -1.132                             | -1.994              |
| <b>4<sup>th</sup></b> |                                    |                     |                                    |                     |                                    | -1.922              | 1.220                              | -1.479              |
| <b>5<sup>th</sup></b> |                                    |                     |                                    |                     |                                    | -1.971              |                                    | -2.016              |
| <b>6<sup>th</sup></b> |                                    |                     |                                    |                     |                                    |                     |                                    | -2.138              |
| <b>7<sup>th</sup></b> |                                    |                     |                                    |                     |                                    |                     |                                    | -2.061              |
| <b>Total</b>          | <b>0</b>                           | <b>0</b>            | <b>4</b>                           | <b>6</b>            | <b>0</b>                           | <b>8</b>            | <b>2</b>                           | <b>12</b>           |

**Table 1b:** On site Magnetic moment of Type 1 finite sized clusters and functionalized cluster assemblies

| Magnetization at Si <sub>12</sub> Cr cluster              |        |        |        |        | Magnetization at Si <sub>12</sub> Mn cluster              |        |        |        |        | Magnetization at Si <sub>12</sub> Fe cluster              |        |        |        |        |
|-----------------------------------------------------------|--------|--------|--------|--------|-----------------------------------------------------------|--------|--------|--------|--------|-----------------------------------------------------------|--------|--------|--------|--------|
| Atoms                                                     | s      | p      | d      | Total  | Atoms                                                     | s      | p      | d      | Total  | Atoms                                                     | s      | p      | d      | Total  |
| Si                                                        | 0.000  | -0.000 | 0.000  | -0.000 | Si                                                        | -0.001 | -0.018 | 0.000  | -0.019 | Si                                                        | 0.000  | 0.000  | 0.000  | 0.000  |
| Si                                                        | 0.000  | -0.000 | 0.000  | -0.000 | Si                                                        | -0.001 | -0.018 | 0.000  | -0.019 | Si                                                        | 0.000  | 0.000  | 0.000  | 0.000  |
| Si                                                        | 0.000  | -0.000 | 0.000  | -0.000 | Si                                                        | -0.001 | -0.018 | 0.000  | -0.019 | Si                                                        | -0.000 | -0.000 | 0.000  | -0.000 |
| Si                                                        | 0.000  | -0.000 | 0.000  | -0.000 | Si                                                        | -0.001 | -0.018 | 0.000  | -0.019 | Si                                                        | -0.000 | -0.000 | 0.000  | -0.000 |
| Si                                                        | 0.000  | -0.000 | 0.000  | -0.000 | Si                                                        | -0.001 | -0.018 | 0.000  | -0.019 | Si                                                        | -0.000 | -0.000 | 0.000  | -0.000 |
| Si                                                        | 0.000  | -0.000 | 0.000  | -0.000 | Si                                                        | -0.001 | -0.018 | 0.000  | -0.019 | Si                                                        | -0.000 | -0.000 | 0.000  | -0.000 |
| Si                                                        | 0.000  | -0.000 | 0.000  | -0.000 | Si                                                        | -0.001 | -0.018 | 0.000  | -0.019 | Si                                                        | 0.000  | 0.000  | 0.000  | 0.000  |
| Si                                                        | 0.000  | -0.000 | 0.000  | -0.000 | Si                                                        | -0.001 | -0.018 | 0.000  | -0.019 | Si                                                        | 0.000  | 0.000  | 0.000  | 0.000  |
| Si                                                        | 0.000  | -0.000 | 0.000  | -0.000 | Si                                                        | -0.001 | -0.018 | 0.000  | -0.019 | Si                                                        | -0.000 | -0.000 | 0.000  | -0.000 |
| Si                                                        | 0.000  | -0.000 | 0.000  | -0.000 | Si                                                        | -0.001 | -0.018 | 0.000  | -0.019 | Si                                                        | -0.000 | -0.000 | 0.000  | -0.000 |
| Si                                                        | 0.000  | -0.000 | 0.000  | -0.000 | Si                                                        | -0.001 | -0.018 | 0.000  | -0.019 | Si                                                        | -0.000 | -0.000 | 0.000  | -0.000 |
| Si                                                        | 0.000  | -0.000 | 0.000  | -0.000 | Si                                                        | -0.001 | -0.018 | 0.000  | -0.019 | Si                                                        | -0.000 | -0.000 | 0.000  | -0.000 |
| Si                                                        | 0.000  | -0.000 | 0.000  | -0.000 | Si                                                        | -0.001 | -0.018 | 0.000  | -0.019 | Si                                                        | -0.000 | -0.000 | 0.000  | -0.000 |
| Cr                                                        | 0.000  | 0.000  | 0.000  | 0.000  | Mn                                                        | 0.015  | 0.016  | 1.495  | 1.526  | Fe                                                        | -0.000 | -0.000 | -0.000 | -0.000 |
| Total                                                     | 0.000  | -0.000 | 0.000  | 0.000  | Total                                                     | 0.001  | -0.202 | 1.495  | 1.294  | Total                                                     | -0.000 | 0.000  | -0.000 | -0.000 |
| Magnetization at Si <sub>24</sub> Cr <sub>3</sub> cluster |        |        |        |        | Magnetization at Si <sub>24</sub> Mn <sub>3</sub> cluster |        |        |        |        | Magnetization at Si <sub>24</sub> Fe <sub>3</sub> cluster |        |        |        |        |
| Atoms                                                     | s      | p      | d      | Total  | Atoms                                                     | s      | p      | d      | Total  | Atoms                                                     | s      | p      | d      | Total  |
| Si                                                        | 0.001  | 0.005  | 0.000  | 0.006  | Si                                                        | -0.003 | -0.023 | 0.000  | -0.026 | Si                                                        | 0.002  | -0.007 | 0.000  | -0.004 |
| Si                                                        | 0.003  | -0.005 | 0.000  | -0.003 | Si                                                        | -0.002 | -0.020 | 0.000  | -0.023 | Si                                                        | 0.002  | -0.005 | 0.000  | -0.003 |
| Si                                                        | 0.002  | 0.008  | 0.000  | 0.010  | Si                                                        | -0.002 | -0.020 | 0.000  | -0.022 | Si                                                        | 0.002  | -0.005 | 0.000  | -0.003 |
| Si                                                        | -0.001 | 0.008  | 0.000  | 0.007  | Si                                                        | -0.002 | -0.020 | 0.000  | -0.022 | Si                                                        | 0.002  | -0.005 | 0.000  | -0.003 |
| Si                                                        | 0.001  | -0.018 | 0.000  | -0.017 | Si                                                        | -0.002 | -0.022 | 0.000  | -0.024 | Si                                                        | 0.002  | -0.007 | 0.000  | -0.004 |
| Si                                                        | 0.004  | -0.010 | 0.000  | -0.006 | Si                                                        | -0.003 | -0.024 | 0.000  | -0.027 | Si                                                        | 0.002  | -0.006 | 0.000  | -0.004 |
| Si                                                        | 0.008  | 0.035  | 0.000  | 0.043  | Si                                                        | -0.000 | -0.009 | 0.000  | -0.009 | Si                                                        | -0.003 | -0.011 | 0.000  | -0.014 |
| Si                                                        | 0.005  | 0.030  | 0.000  | 0.034  | Si                                                        | 0.002  | -0.005 | 0.000  | -0.004 | Si                                                        | -0.003 | -0.009 | 0.000  | -0.011 |
| Si                                                        | 0.005  | 0.011  | 0.000  | 0.016  | Si                                                        | 0.002  | -0.005 | 0.000  | -0.003 | Si                                                        | -0.003 | -0.009 | 0.000  | -0.012 |
| Si                                                        | 0.004  | 0.011  | 0.000  | 0.015  | Si                                                        | 0.001  | -0.006 | 0.000  | -0.005 | Si                                                        | -0.003 | -0.009 | 0.000  | -0.011 |
| Si                                                        | 0.002  | 0.010  | 0.000  | 0.011  | Si                                                        | 0.001  | -0.006 | 0.000  | -0.005 | Si                                                        | -0.003 | -0.010 | 0.000  | -0.013 |
| Si                                                        | 0.004  | 0.017  | 0.000  | 0.021  | Si                                                        | -0.001 | -0.009 | 0.000  | -0.009 | Si                                                        | -0.003 | -0.010 | 0.000  | -0.013 |
| Si                                                        | 0.014  | 0.013  | 0.000  | 0.027  | Si                                                        | 0.002  | 0.008  | 0.000  | 0.011  | Si                                                        | -0.003 | -0.009 | 0.000  | -0.012 |
| Si                                                        | 0.001  | 0.006  | 0.000  | 0.006  | Si                                                        | 0.003  | 0.009  | 0.000  | 0.012  | Si                                                        | -0.003 | -0.010 | 0.000  | -0.013 |
| Si                                                        | 0.003  | 0.005  | 0.000  | 0.009  | Si                                                        | 0.002  | -0.003 | 0.000  | -0.001 | Si                                                        | -0.003 | -0.010 | 0.000  | -0.013 |
| Si                                                        | 0.015  | 0.024  | 0.000  | 0.040  | Si                                                        | 0.002  | 0.002  | 0.000  | 0.004  | Si                                                        | -0.003 | -0.010 | 0.000  | -0.013 |
| Si                                                        | 0.003  | 0.018  | 0.000  | 0.022  | Si                                                        | 0.004  | 0.005  | 0.000  | 0.009  | Si                                                        | -0.003 | -0.009 | 0.000  | -0.012 |
| Si                                                        | -0.000 | -0.000 | 0.000  | -0.000 | Si                                                        | 0.003  | 0.001  | 0.000  | 0.004  | Si                                                        | -0.003 | -0.009 | 0.000  | -0.012 |
| Si                                                        | 0.002  | -0.007 | 0.000  | -0.005 | Si                                                        | 0.003  | 0.034  | 0.000  | 0.037  | Si                                                        | 0.002  | -0.006 | 0.000  | -0.003 |
| Si                                                        | -0.002 | -0.003 | 0.000  | -0.005 | Si                                                        | 0.004  | 0.037  | 0.000  | 0.041  | Si                                                        | 0.002  | -0.006 | 0.000  | -0.004 |
| Si                                                        | 0.003  | 0.014  | 0.000  | 0.017  | Si                                                        | 0.003  | 0.031  | 0.000  | 0.034  | Si                                                        | 0.002  | -0.007 | 0.000  | -0.004 |
| Si                                                        | 0.003  | -0.002 | 0.000  | 0.001  | Si                                                        | 0.003  | 0.032  | 0.000  | 0.035  | Si                                                        | 0.002  | -0.007 | 0.000  | -0.005 |
| Si                                                        | -0.000 | 0.008  | 0.000  | 0.007  | Si                                                        | 0.004  | 0.040  | 0.000  | 0.045  | Si                                                        | 0.002  | -0.005 | 0.000  | -0.003 |
| Si                                                        | -0.001 | 0.006  | 0.000  | 0.005  | Si                                                        | 0.004  | 0.040  | 0.000  | 0.043  | Si                                                        | 0.002  | -0.006 | 0.000  | -0.003 |
| Cr                                                        | 0.014  | 0.012  | 1.200  | 1.657  | Mn                                                        | 0.006  | 0.008  | 0.463  | 0.477  | Fe                                                        | -0.011 | -0.009 | -1.460 | -1.480 |
| Cr                                                        | 0.015  | 0.018  | 1.304  | 1.767  | Mn                                                        | -0.022 | -0.025 | -2.304 | -2.350 | Fe                                                        | -0.011 | -0.009 | -1.479 | -1.499 |
| Cr                                                        | 0.000  | 0.007  | -0.133 | -0.125 | Mn                                                        | -0.008 | -0.005 | -1.135 | -1.148 | Fe                                                        | -0.016 | -0.006 | -2.565 | -2.586 |
| Total                                                     | 0.108  | 0.222  | 2.371  | 3.561  | Total                                                     | 0.004  | 0.045  | -2.976 | -2.927 | Total                                                     | -0.048 | -0.207 | -5.504 | -5.758 |
| Magnetization at Si <sub>36</sub> Cr <sub>5</sub> cluster |        |        |        |        | Magnetization at Si <sub>36</sub> Mn <sub>5</sub> cluster |        |        |        |        | Magnetization at Si <sub>36</sub> Fe <sub>5</sub> cluster |        |        |        |        |
| Atoms                                                     | s      | p      | d      | Total  | Atoms                                                     | s      | p      | d      | Total  | Atoms                                                     | s      | p      | d      | Total  |
| Si                                                        | 0.000  | 0.000  | 0.000  | 0.000  | Si                                                        | 0.001  | 0.010  | 0.000  | 0.010  | Si                                                        | 0.002  | 0.005  | 0.000  | 0.007  |

|       |        |        |        |        |       |        |        |        |        |       |        |        |        |        |
|-------|--------|--------|--------|--------|-------|--------|--------|--------|--------|-------|--------|--------|--------|--------|
| Si    | 0.000  | 0.000  | 0.000  | 0.000  | Si    | 0.000  | -0.007 | 0.000  | -0.006 | Si    | 0.001  | 0.008  | 0.000  | 0.009  |
| Si    | 0.000  | 0.000  | 0.000  | 0.000  | Si    | 0.000  | -0.015 | 0.000  | -0.015 | Si    | -0.000 | 0.003  | 0.000  | 0.003  |
| Si    | 0.000  | 0.000  | 0.000  | 0.000  | Si    | -0.003 | -0.005 | 0.000  | -0.008 | Si    | 0.001  | 0.007  | 0.000  | 0.008  |
| Si    | 0.000  | 0.000  | 0.000  | 0.000  | Si    | 0.002  | -0.005 | 0.000  | -0.003 | Si    | 0.002  | 0.015  | 0.000  | 0.017  |
| Si    | 0.000  | 0.000  | 0.000  | 0.000  | Si    | 0.003  | -0.002 | 0.000  | 0.001  | Si    | 0.002  | 0.010  | 0.000  | 0.012  |
| Si    | 0.000  | 0.000  | 0.000  | 0.000  | Si    | -0.003 | -0.021 | 0.000  | -0.024 | Si    | 0.000  | 0.000  | 0.000  | 0.000  |
| Si    | 0.000  | 0.000  | 0.000  | 0.000  | Si    | 0.002  | -0.001 | 0.000  | 0.001  | Si    | 0.002  | 0.012  | 0.000  | 0.014  |
| Si    | 0.000  | 0.000  | 0.000  | 0.000  | Si    | 0.003  | 0.014  | 0.000  | 0.017  | Si    | 0.003  | 0.009  | 0.000  | 0.012  |
| Si    | 0.000  | 0.000  | 0.000  | 0.000  | Si    | -0.001 | -0.009 | 0.000  | -0.010 | Si    | 0.001  | 0.008  | 0.000  | 0.009  |
| Si    | 0.000  | 0.000  | 0.000  | 0.000  | Si    | 0.000  | 0.003  | 0.000  | 0.003  | Si    | 0.002  | 0.015  | 0.000  | 0.017  |
| Si    | 0.000  | 0.000  | 0.000  | 0.000  | Si    | 0.001  | 0.007  | 0.000  | 0.008  | Si    | 0.000  | 0.009  | 0.000  | 0.009  |
| Si    | -0.000 | -0.000 | 0.000  | -0.000 | Si    | -0.005 | -0.004 | 0.000  | -0.008 | Si    | -0.007 | -0.002 | 0.000  | -0.009 |
| Si    | -0.000 | -0.000 | 0.000  | -0.000 | Si    | -0.000 | -0.004 | 0.000  | -0.004 | Si    | 0.000  | 0.006  | 0.000  | 0.006  |
| Si    | -0.000 | -0.000 | 0.000  | -0.000 | Si    | -0.000 | -0.006 | 0.000  | -0.007 | Si    | -0.003 | 0.004  | 0.000  | 0.001  |
| Si    | -0.000 | -0.000 | 0.000  | -0.000 | Si    | -0.005 | -0.007 | 0.000  | -0.012 | Si    | 0.001  | 0.008  | 0.000  | 0.008  |
| Si    | -0.000 | -0.000 | 0.000  | -0.000 | Si    | 0.000  | -0.008 | 0.000  | -0.008 | Si    | -0.002 | 0.004  | 0.000  | 0.001  |
| Si    | -0.000 | -0.000 | 0.000  | -0.000 | Si    | -0.002 | -0.007 | 0.000  | -0.009 | Si    | -0.002 | 0.001  | 0.000  | -0.001 |
| Si    | -0.000 | -0.000 | 0.000  | -0.000 | Si    | 0.001  | 0.007  | 0.000  | 0.008  | Si    | 0.001  | 0.018  | 0.000  | 0.019  |
| Si    | -0.000 | -0.000 | 0.000  | -0.000 | Si    | -0.002 | 0.001  | 0.000  | -0.002 | Si    | 0.003  | 0.013  | 0.000  | 0.016  |
| Si    | -0.000 | -0.000 | 0.000  | -0.000 | Si    | 0.002  | 0.001  | 0.000  | 0.003  | Si    | 0.002  | 0.012  | 0.000  | 0.015  |
| Si    | -0.000 | -0.000 | 0.000  | -0.000 | Si    | 0.002  | -0.000 | 0.000  | 0.001  | Si    | 0.003  | 0.008  | 0.000  | 0.011  |
| Si    | -0.000 | -0.000 | 0.000  | -0.000 | Si    | -0.001 | 0.005  | 0.000  | 0.004  | Si    | 0.003  | 0.023  | 0.000  | 0.026  |
| Si    | -0.000 | -0.000 | 0.000  | -0.000 | Si    | 0.001  | 0.008  | 0.000  | 0.009  | Si    | 0.003  | 0.015  | 0.000  | 0.017  |
| Si    | -0.000 | -0.000 | 0.000  | -0.000 | Si    | -0.004 | -0.013 | 0.000  | -0.017 | Si    | -0.001 | 0.008  | 0.000  | 0.007  |
| Si    | -0.000 | -0.000 | 0.000  | -0.000 | Si    | -0.003 | 0.007  | 0.000  | 0.004  | Si    | 0.001  | 0.010  | 0.000  | 0.010  |
| Si    | -0.000 | -0.000 | 0.000  | -0.000 | Si    | -0.006 | 0.009  | 0.000  | 0.003  | Si    | -0.006 | 0.004  | 0.000  | -0.002 |
| Si    | -0.000 | -0.000 | 0.000  | -0.000 | Si    | -0.004 | -0.018 | 0.000  | -0.022 | Si    | -0.001 | 0.006  | 0.000  | 0.005  |
| Si    | -0.000 | -0.000 | 0.000  | -0.000 | Si    | 0.001  | 0.004  | 0.000  | 0.005  | Si    | -0.001 | 0.009  | 0.000  | 0.007  |
| Si    | -0.000 | -0.000 | 0.000  | -0.000 | Si    | 0.000  | 0.012  | 0.000  | 0.012  | Si    | 0.000  | 0.009  | 0.000  | 0.009  |
| Si    | -0.000 | -0.000 | 0.000  | -0.000 | Si    | 0.001  | 0.029  | 0.000  | 0.030  | Si    | 0.004  | 0.025  | 0.000  | 0.028  |
| Si    | -0.000 | -0.000 | 0.000  | -0.000 | Si    | 0.004  | 0.018  | 0.000  | 0.022  | Si    | 0.003  | 0.007  | 0.000  | 0.010  |
| Si    | -0.000 | -0.000 | 0.000  | -0.000 | Si    | 0.002  | 0.024  | 0.000  | 0.027  | Si    | 0.001  | 0.017  | 0.000  | 0.018  |
| Si    | -0.000 | -0.000 | 0.000  | -0.000 | Si    | 0.003  | 0.030  | 0.000  | 0.033  | Si    | 0.003  | 0.014  | 0.000  | 0.017  |
| Si    | -0.000 | -0.000 | 0.000  | -0.000 | Si    | 0.002  | 0.016  | 0.000  | 0.019  | Si    | 0.002  | 0.018  | 0.000  | 0.020  |
| Si    | -0.000 | -0.000 | 0.000  | -0.000 | Si    | 0.002  | 0.027  | 0.000  | 0.028  | Si    | 0.003  | 0.015  | 0.000  | 0.019  |
| Cr    | -0.000 | -0.000 | -0.001 | -0.001 | Mn    | -0.019 | -0.034 | -2.608 | -2.662 | Fe    | -0.016 | -0.027 | -2.082 | -2.125 |
| Cr    | 0.000  | 0.000  | 0.000  | 0.000  | Mn    | -0.000 | 0.006  | -0.281 | -0.275 | Fe    | -0.010 | -0.017 | -1.431 | -1.458 |
| Cr    | 0.000  | 0.000  | 0.000  | 0.000  | Mn    | -0.017 | -0.022 | -2.062 | -2.101 | Fe    | -0.011 | -0.015 | -1.481 | -1.507 |
| Cr    | 0.000  | 0.000  | 0.000  | 0.000  | Mn    | -0.008 | -0.011 | -1.480 | -1.499 | Fe    | -0.009 | -0.005 | -1.908 | -1.922 |
| Cr    | 0.000  | 0.000  | 0.000  | 0.000  | Mn    | -0.012 | -0.011 | -2.003 | -2.026 | Fe    | -0.010 | -0.004 | -1.957 | -1.971 |
| ----- |        |        |        |        | ----- |        |        |        |        | ----- |        |        |        |        |
| Total | -0.000 | 0.000  | -0.000 | -0.000 | Total | -0.062 | 0.026  | -8.434 | -8.470 | Total | -0.032 | 0.280  | -8.859 | -8.610 |

**Table 1c:** On site Magnetic moment for Type 2 finite sized clusters and functionalized cluster assemblies

| Magnetization of Si <sub>16</sub> Cr |       |        |       |        | Magnetization of Si <sub>16</sub> Mn |        |        |       |        | Magnetization of Si <sub>16</sub> Fe |       |        |       |        |
|--------------------------------------|-------|--------|-------|--------|--------------------------------------|--------|--------|-------|--------|--------------------------------------|-------|--------|-------|--------|
| Atoms                                | s     | p      | d     | Total  | Atoms                                | s      | p      | d     | Total  | Atoms                                | s     | p      | d     | Total  |
| Si                                   | 0.000 | -0.000 | 0.000 | -0.000 | Si                                   | 0.000  | 0.015  | 0.000 | 0.016  | Si                                   | 0.000 | -0.000 | 0.000 | -0.000 |
| Si                                   | 0.000 | -0.000 | 0.000 | -0.000 | Si                                   | -0.001 | -0.016 | 0.000 | -0.017 | Si                                   | 0.000 | -0.000 | 0.000 | -0.000 |
| Si                                   | 0.000 | -0.000 | 0.000 | -0.000 | Si                                   | -0.000 | -0.015 | 0.000 | -0.016 | Si                                   | 0.000 | -0.000 | 0.000 | -0.000 |
| Si                                   | 0.000 | -0.000 | 0.000 | -0.000 | Si                                   | -0.000 | -0.019 | 0.000 | -0.019 | Si                                   | 0.000 | -0.000 | 0.000 | -0.000 |
| Si                                   | 0.000 | -0.000 | 0.000 | -0.000 | Si                                   | 0.002  | 0.009  | 0.000 | 0.011  | Si                                   | 0.000 | 0.000  | 0.000 | 0.000  |
| Si                                   | 0.000 | -0.000 | 0.000 | -0.000 | Si                                   | 0.020  | 0.098  | 0.000 | 0.118  | Si                                   | 0.000 | 0.000  | 0.000 | 0.000  |
| Si                                   | 0.000 | -0.000 | 0.000 | -0.000 | Si                                   | -0.001 | -0.012 | 0.000 | -0.013 | Si                                   | 0.000 | 0.000  | 0.000 | 0.000  |

|                                                   |        |        |       |        |                                                   |        |        |       |        |                                                   |        |        |       |        |
|---------------------------------------------------|--------|--------|-------|--------|---------------------------------------------------|--------|--------|-------|--------|---------------------------------------------------|--------|--------|-------|--------|
| Si                                                | 0.000  | -0.000 | 0.000 | -0.000 | Si                                                | -0.001 | 0.000  | 0.000 | -0.000 | Si                                                | 0.000  | 0.000  | 0.000 | 0.000  |
| Si                                                | 0.000  | -0.000 | 0.000 | -0.000 | Si                                                | -0.002 | -0.003 | 0.000 | -0.005 | Si                                                | 0.000  | -0.000 | 0.000 | -0.000 |
| Si                                                | 0.000  | -0.000 | 0.000 | -0.000 | Si                                                | -0.003 | -0.004 | 0.000 | -0.006 | Si                                                | 0.000  | -0.000 | 0.000 | -0.000 |
| Si                                                | 0.000  | -0.000 | 0.000 | -0.000 | Si                                                | -0.001 | 0.002  | 0.000 | 0.001  | Si                                                | 0.000  | -0.000 | 0.000 | -0.000 |
| Si                                                | 0.000  | -0.000 | 0.000 | -0.000 | Si                                                | -0.002 | -0.020 | 0.000 | -0.022 | Si                                                | 0.000  | -0.000 | 0.000 | -0.000 |
| Si                                                | 0.000  | -0.000 | 0.000 | -0.000 | Si                                                | -0.002 | -0.020 | 0.000 | -0.022 | Si                                                | 0.000  | -0.000 | 0.000 | -0.000 |
| Si                                                | 0.000  | -0.000 | 0.000 | -0.000 | Si                                                | -0.001 | -0.001 | 0.000 | -0.001 | Si                                                | 0.000  | -0.000 | 0.000 | -0.000 |
| Si                                                | 0.000  | -0.000 | 0.000 | -0.000 | Si                                                | -0.003 | -0.018 | 0.000 | -0.021 | Si                                                | 0.000  | -0.000 | 0.000 | -0.000 |
| Si                                                | 0.000  | -0.000 | 0.000 | -0.000 | Si                                                | -0.003 | -0.026 | 0.000 | -0.029 | Si                                                | 0.000  | -0.000 | 0.000 | -0.000 |
| Cr                                                | 0.000  | 0.000  | 0.000 | 0.000  | Mn                                                | 0.011  | 0.014  | 1.052 | 1.077  | Fe                                                | 0.000  | 0.000  | 0.000 | 0.000  |
| -----                                             |        |        |       |        | -----                                             |        |        |       |        | -----                                             |        |        |       |        |
| Total                                             | 0.000  | -0.000 | 0.000 | 0.000  | Total                                             | 0.013  | -0.015 | 1.052 | 1.051  | Total                                             | 0.000  | -0.000 | 0.000 | 0.000  |
| Magnetization of Si <sub>28</sub> Cr <sub>2</sub> |        |        |       |        | Magnetization of Si <sub>28</sub> Mn <sub>2</sub> |        |        |       |        | Magnetization of Si <sub>28</sub> Fe <sub>2</sub> |        |        |       |        |
| Atoms                                             | s      | p      | d     | Total  | Atoms                                             | s      | p      | d     | Total  | Atoms                                             | s      | p      | d     | Total  |
| -----                                             |        |        |       |        | -----                                             |        |        |       |        | -----                                             |        |        |       |        |
| Si                                                | 0.000  | -0.000 | 0.000 | -0.000 | Si                                                | -0.001 | -0.016 | 0.000 | -0.017 | Si                                                | 0.003  | 0.002  | 0.000 | 0.005  |
| Si                                                | 0.000  | -0.000 | 0.000 | -0.000 | Si                                                | -0.002 | -0.014 | 0.000 | -0.016 | Si                                                | 0.001  | 0.003  | 0.000 | 0.004  |
| Si                                                | 0.000  | -0.000 | 0.000 | -0.000 | Si                                                | -0.002 | -0.014 | 0.000 | -0.016 | Si                                                | -0.000 | 0.004  | 0.000 | 0.004  |
| Si                                                | 0.000  | -0.000 | 0.000 | -0.000 | Si                                                | -0.001 | -0.015 | 0.000 | -0.016 | Si                                                | -0.000 | 0.001  | 0.000 | 0.001  |
| Si                                                | 0.000  | -0.000 | 0.000 | -0.000 | Si                                                | 0.007  | -0.014 | 0.000 | -0.007 | Si                                                | 0.003  | -0.001 | 0.000 | 0.002  |
| Si                                                | 0.000  | -0.000 | 0.000 | -0.000 | Si                                                | 0.008  | -0.010 | 0.000 | -0.003 | Si                                                | 0.005  | 0.006  | 0.000 | 0.011  |
| Si                                                | 0.000  | -0.000 | 0.000 | -0.000 | Si                                                | -0.001 | -0.014 | 0.000 | -0.015 | Si                                                | 0.000  | 0.001  | 0.000 | 0.001  |
| Si                                                | 0.000  | -0.000 | 0.000 | -0.000 | Si                                                | -0.001 | -0.001 | 0.000 | -0.001 | Si                                                | 0.002  | 0.008  | 0.000 | 0.010  |
| Si                                                | 0.000  | -0.000 | 0.000 | -0.000 | Si                                                | -0.001 | -0.001 | 0.000 | -0.001 | Si                                                | -0.000 | 0.001  | 0.000 | 0.001  |
| Si                                                | 0.000  | -0.000 | 0.000 | -0.000 | Si                                                | -0.004 | -0.013 | 0.000 | -0.016 | Si                                                | 0.003  | -0.015 | 0.000 | -0.011 |
| Si                                                | 0.000  | -0.000 | 0.000 | -0.000 | Si                                                | -0.002 | -0.009 | 0.000 | -0.012 | Si                                                | 0.004  | -0.008 | 0.000 | -0.003 |
| Si                                                | 0.000  | -0.000 | 0.000 | -0.000 | Si                                                | -0.004 | -0.013 | 0.000 | -0.017 | Si                                                | 0.009  | -0.008 | 0.000 | 0.001  |
| Si                                                | 0.000  | -0.000 | 0.000 | -0.000 | Si                                                | -0.002 | -0.010 | 0.000 | -0.012 | Si                                                | 0.002  | -0.009 | 0.000 | -0.007 |
| Si                                                | 0.000  | -0.000 | 0.000 | -0.000 | Si                                                | 0.007  | -0.001 | 0.000 | 0.006  | Si                                                | -0.003 | -0.000 | 0.000 | -0.003 |
| Si                                                | 0.000  | -0.000 | 0.000 | -0.000 | Si                                                | 0.006  | -0.003 | 0.000 | 0.003  | Si                                                | -0.000 | 0.010  | 0.000 | 0.009  |
| Si                                                | 0.000  | -0.000 | 0.000 | -0.000 | Si                                                | 0.007  | -0.001 | 0.000 | 0.005  | Si                                                | 0.012  | 0.074  | 0.000 | 0.086  |
| Si                                                | 0.000  | -0.000 | 0.000 | -0.000 | Si                                                | -0.002 | -0.010 | 0.000 | -0.012 | Si                                                | 0.004  | -0.007 | 0.000 | -0.003 |
| Si                                                | 0.000  | -0.000 | 0.000 | -0.000 | Si                                                | -0.004 | -0.013 | 0.000 | -0.016 | Si                                                | 0.009  | -0.008 | 0.000 | 0.001  |
| Si                                                | 0.000  | -0.000 | 0.000 | -0.000 | Si                                                | 0.006  | -0.003 | 0.000 | 0.003  | Si                                                | -0.000 | 0.010  | 0.000 | 0.010  |
| Si                                                | 0.000  | -0.000 | 0.000 | -0.000 | Si                                                | -0.004 | -0.012 | 0.000 | -0.016 | Si                                                | 0.004  | -0.015 | 0.000 | -0.011 |
| Si                                                | 0.000  | -0.000 | 0.000 | -0.000 | Si                                                | -0.002 | -0.010 | 0.000 | -0.012 | Si                                                | 0.003  | -0.001 | 0.000 | 0.003  |
| Si                                                | 0.000  | -0.000 | 0.000 | -0.000 | Si                                                | -0.001 | -0.001 | 0.000 | -0.001 | Si                                                | -0.000 | 0.001  | 0.000 | 0.001  |
| Si                                                | 0.000  | -0.000 | 0.000 | -0.000 | Si                                                | -0.001 | -0.001 | 0.000 | -0.001 | Si                                                | 0.003  | 0.008  | 0.000 | 0.010  |
| Si                                                | 0.000  | -0.000 | 0.000 | -0.000 | Si                                                | -0.002 | -0.014 | 0.000 | -0.016 | Si                                                | 0.001  | 0.003  | 0.000 | 0.004  |
| Si                                                | 0.000  | -0.000 | 0.000 | -0.000 | Si                                                | -0.001 | -0.016 | 0.000 | -0.018 | Si                                                | 0.003  | 0.002  | 0.000 | 0.005  |
| Si                                                | 0.000  | -0.000 | 0.000 | -0.000 | Si                                                | 0.007  | -0.013 | 0.000 | -0.007 | Si                                                | 0.002  | -0.000 | 0.000 | 0.002  |
| Si                                                | 0.000  | -0.000 | 0.000 | -0.000 | Si                                                | 0.007  | -0.010 | 0.000 | -0.003 | Si                                                | 0.005  | 0.006  | 0.000 | 0.011  |
| Si                                                | 0.000  | -0.000 | 0.000 | -0.000 | Si                                                | -0.002 | -0.014 | 0.000 | -0.016 | Si                                                | -0.000 | 0.004  | 0.000 | 0.004  |
| Cr                                                | 0.000  | 0.000  | 0.000 | 0.000  | Mn                                                | 0.009  | 0.012  | 0.903 | 0.925  | Fe                                                | 0.001  | 0.002  | 0.042 | 0.046  |
| Cr                                                | 0.000  | 0.000  | 0.000 | 0.000  | Mn                                                | 0.004  | 0.006  | 0.466 | 0.476  | Fe                                                | 0.010  | 0.018  | 1.110 | 1.138  |
| -----                                             |        |        |       |        | -----                                             |        |        |       |        | -----                                             |        |        |       |        |
| Total                                             | 0.000  | -0.000 | 0.000 | 0.000  | Total                                             | 0.031  | -0.248 | 1.369 | 1.152  | Total                                             | 0.085  | 0.093  | 1.152 | 1.331  |
| Magnetization of Si <sub>40</sub> Cr <sub>3</sub> |        |        |       |        | Magnetization of Si <sub>40</sub> Mn <sub>3</sub> |        |        |       |        | Magnetization of Si <sub>40</sub> Fe <sub>3</sub> |        |        |       |        |
| Atoms                                             | s      | p      | d     | Total  | Atoms                                             | s      | p      | d     | Total  | Atoms                                             | s      | p      | d     | Total  |
| -----                                             |        |        |       |        | -----                                             |        |        |       |        | -----                                             |        |        |       |        |
| Si                                                | 0.008  | 0.009  | 0.000 | 0.017  | Si                                                | 0.010  | 0.011  | 0.000 | 0.022  | Si                                                | 0.000  | -0.000 | 0.000 | -0.000 |
| Si                                                | 0.001  | 0.013  | 0.000 | 0.014  | Si                                                | 0.002  | -0.001 | 0.000 | 0.001  | Si                                                | 0.000  | -0.000 | 0.000 | -0.000 |
| Si                                                | 0.001  | 0.013  | 0.000 | 0.014  | Si                                                | 0.004  | -0.003 | 0.000 | 0.002  | Si                                                | 0.000  | -0.000 | 0.000 | -0.000 |
| Si                                                | 0.008  | 0.009  | 0.000 | 0.017  | Si                                                | 0.011  | 0.011  | 0.000 | 0.022  | Si                                                | 0.000  | -0.000 | 0.000 | -0.000 |
| Si                                                | -0.000 | 0.016  | 0.000 | 0.016  | Si                                                | 0.003  | 0.017  | 0.000 | 0.021  | Si                                                | 0.000  | -0.000 | 0.000 | -0.000 |
| Si                                                | -0.000 | 0.016  | 0.000 | 0.016  | Si                                                | 0.003  | 0.017  | 0.000 | 0.020  | Si                                                | 0.000  | -0.000 | 0.000 | -0.000 |

|       |        |        |        |        |       |       |        |       |        |       |       |        |       |        |
|-------|--------|--------|--------|--------|-------|-------|--------|-------|--------|-------|-------|--------|-------|--------|
| Si    | 0.008  | 0.008  | 0.000  | 0.017  | Si    | 0.011 | 0.010  | 0.000 | 0.020  | Si    | 0.000 | -0.000 | 0.000 | -0.000 |
| Si    | 0.000  | 0.001  | 0.000  | 0.001  | Si    | 0.006 | -0.005 | 0.000 | 0.001  | Si    | 0.000 | -0.000 | 0.000 | -0.000 |
| Si    | 0.000  | 0.000  | 0.000  | 0.001  | Si    | 0.004 | -0.009 | 0.000 | -0.006 | Si    | 0.000 | -0.000 | 0.000 | -0.000 |
| Si    | 0.000  | 0.001  | 0.000  | 0.001  | Si    | 0.006 | -0.005 | 0.000 | 0.001  | Si    | 0.000 | -0.000 | 0.000 | -0.000 |
| Si    | 0.000  | 0.001  | 0.000  | 0.001  | Si    | 0.004 | -0.010 | 0.000 | -0.006 | Si    | 0.000 | -0.000 | 0.000 | -0.000 |
| Si    | 0.001  | 0.013  | 0.000  | 0.015  | Si    | 0.003 | -0.005 | 0.000 | -0.002 | Si    | 0.000 | -0.000 | 0.000 | -0.000 |
| Si    | 0.008  | 0.009  | 0.000  | 0.017  | Si    | 0.010 | 0.010  | 0.000 | 0.020  | Si    | 0.000 | -0.000 | 0.000 | -0.000 |
| Si    | -0.000 | 0.016  | 0.000  | 0.016  | Si    | 0.003 | 0.016  | 0.000 | 0.019  | Si    | 0.000 | -0.000 | 0.000 | -0.000 |
| Si    | -0.000 | 0.016  | 0.000  | 0.016  | Si    | 0.003 | 0.016  | 0.000 | 0.019  | Si    | 0.000 | -0.000 | 0.000 | -0.000 |
| Si    | 0.001  | 0.013  | 0.000  | 0.014  | Si    | 0.002 | -0.001 | 0.000 | 0.001  | Si    | 0.000 | -0.000 | 0.000 | -0.000 |
| Si    | 0.001  | 0.002  | 0.000  | 0.002  | Si    | 0.003 | -0.007 | 0.000 | -0.003 | Si    | 0.000 | -0.000 | 0.000 | -0.000 |
| Si    | 0.000  | 0.001  | 0.000  | 0.001  | Si    | 0.001 | -0.000 | 0.000 | 0.001  | Si    | 0.000 | -0.000 | 0.000 | -0.000 |
| Si    | 0.000  | 0.001  | 0.000  | 0.001  | Si    | 0.001 | -0.000 | 0.000 | 0.001  | Si    | 0.000 | -0.000 | 0.000 | -0.000 |
| Si    | 0.001  | 0.002  | 0.000  | 0.002  | Si    | 0.003 | -0.007 | 0.000 | -0.003 | Si    | 0.000 | -0.000 | 0.000 | -0.000 |
| Si    | 0.000  | 0.001  | 0.000  | 0.001  | Si    | 0.018 | -0.011 | 0.000 | 0.007  | Si    | 0.000 | -0.000 | 0.000 | -0.000 |
| Si    | 0.000  | 0.001  | 0.000  | 0.001  | Si    | 0.018 | -0.010 | 0.000 | 0.008  | Si    | 0.000 | -0.000 | 0.000 | -0.000 |
| Si    | 0.001  | 0.002  | 0.000  | 0.003  | Si    | 0.003 | -0.007 | 0.000 | -0.003 | Si    | 0.000 | -0.000 | 0.000 | -0.000 |
| Si    | -0.001 | 0.002  | 0.000  | 0.001  | Si    | 0.001 | 0.005  | 0.000 | 0.005  | Si    | 0.000 | -0.000 | 0.000 | -0.000 |
| Si    | -0.001 | 0.002  | 0.000  | 0.002  | Si    | 0.000 | 0.005  | 0.000 | 0.005  | Si    | 0.000 | -0.000 | 0.000 | -0.000 |
| Si    | -0.002 | -0.015 | 0.000  | -0.018 | Si    | 0.001 | -0.039 | 0.000 | -0.037 | Si    | 0.000 | -0.000 | 0.000 | -0.000 |
| Si    | -0.001 | 0.003  | 0.000  | 0.002  | Si    | 0.001 | -0.014 | 0.000 | -0.014 | Si    | 0.000 | -0.000 | 0.000 | -0.000 |
| Si    | -0.002 | -0.015 | 0.000  | -0.018 | Si    | 0.002 | -0.039 | 0.000 | -0.037 | Si    | 0.000 | -0.000 | 0.000 | -0.000 |
| Si    | -0.001 | 0.003  | 0.000  | 0.002  | Si    | 0.001 | -0.015 | 0.000 | -0.014 | Si    | 0.000 | -0.000 | 0.000 | -0.000 |
| Si    | -0.001 | 0.003  | 0.000  | 0.002  | Si    | 0.001 | -0.015 | 0.000 | -0.014 | Si    | 0.000 | -0.000 | 0.000 | -0.000 |
| Si    | -0.001 | 0.003  | 0.000  | 0.002  | Si    | 0.001 | -0.015 | 0.000 | -0.014 | Si    | 0.000 | -0.000 | 0.000 | -0.000 |
| Si    | -0.002 | -0.015 | 0.000  | -0.018 | Si    | 0.002 | -0.038 | 0.000 | -0.036 | Si    | 0.000 | -0.000 | 0.000 | -0.000 |
| Si    | -0.002 | -0.015 | 0.000  | -0.017 | Si    | 0.002 | -0.039 | 0.000 | -0.037 | Si    | 0.000 | -0.000 | 0.000 | -0.000 |
| Si    | -0.001 | 0.002  | 0.000  | 0.002  | Si    | 0.000 | -0.015 | 0.000 | -0.014 | Si    | 0.000 | -0.000 | 0.000 | -0.000 |
| Si    | -0.001 | 0.002  | 0.000  | 0.002  | Si    | 0.001 | 0.005  | 0.000 | 0.005  | Si    | 0.000 | -0.000 | 0.000 | -0.000 |
| Si    | -0.001 | 0.002  | 0.000  | 0.002  | Si    | 0.000 | 0.004  | 0.000 | 0.005  | Si    | 0.000 | -0.000 | 0.000 | -0.000 |
| Si    | 0.000  | 0.001  | 0.000  | 0.001  | Si    | 0.002 | 0.000  | 0.000 | 0.002  | Si    | 0.000 | -0.000 | 0.000 | -0.000 |
| Si    | 0.001  | 0.002  | 0.000  | 0.002  | Si    | 0.004 | -0.006 | 0.000 | -0.002 | Si    | 0.000 | -0.000 | 0.000 | -0.000 |
| Si    | 0.000  | 0.001  | 0.000  | 0.001  | Si    | 0.018 | -0.011 | 0.000 | 0.007  | Si    | 0.000 | -0.000 | 0.000 | -0.000 |
| Si    | 0.000  | 0.001  | 0.000  | 0.001  | Si    | 0.018 | -0.009 | 0.000 | 0.009  | Si    | 0.000 | -0.000 | 0.000 | -0.000 |
| Si    | 0.000  | 0.001  | 0.000  | 0.001  | Si    | 0.002 | -0.000 | 0.000 | 0.001  | Si    | 0.000 | -0.000 | 0.000 | -0.000 |
| Cr    | -0.001 | -0.003 | -0.081 | -0.085 | Mn    | 0.013 | 0.018  | 1.414 | 1.445  | Fe    | 0.000 | 0.000  | 0.000 | 0.000  |
| Cr    | 0.014  | 0.020  | 1.247  | 1.280  | Mn    | 0.029 | 0.027  | 2.683 | 2.739  | Fe    | 0.000 | 0.000  | 0.000 | 0.000  |
| Cr    | -0.002 | -0.003 | -0.032 | -0.038 | Mn    | 0.010 | 0.014  | 1.109 | 1.133  | Fe    | 0.000 | 0.000  | 0.000 | 0.000  |
| ----- |        |        |        |        | ----- |       |        |       |        | ----- |       |        |       |        |
| Total | 0.037  | 0.142  | 1.133  | 1.313  | Total | 0.238 | -0.132 | 5.206 | 5.312  | Total | 0.000 | -0.000 | 0.000 | 0.000  |

**Table 1d:** Onsite magnetic moment of each unit cell in 1D SiNT's.

| Magnetization of Si <sub>24</sub> Cr <sub>4</sub> : Type 1 |        |       |       |       | Magnetization of Si <sub>24</sub> Mn <sub>4</sub> : Type 1 |        |        |       |        | Magnetization of Si <sub>24</sub> Fe <sub>4</sub> : Type 1 |        |        |       |        |
|------------------------------------------------------------|--------|-------|-------|-------|------------------------------------------------------------|--------|--------|-------|--------|------------------------------------------------------------|--------|--------|-------|--------|
| Atoms                                                      | s      | p     | d     | Total | Atoms                                                      | s      | p      | d     | Total  | Atoms                                                      | s      | p      | d     | Total  |
| Si                                                         | 0.000  | 0.014 | 0.000 | 0.014 | Si                                                         | -0.002 | -0.017 | 0.000 | -0.019 | Si                                                         | 0.001  | 0.010  | 0.000 | 0.011  |
| Si                                                         | -0.000 | 0.014 | 0.000 | 0.014 | Si                                                         | -0.002 | -0.017 | 0.000 | -0.019 | Si                                                         | 0.001  | 0.010  | 0.000 | 0.011  |
| Si                                                         | 0.001  | 0.032 | 0.000 | 0.032 | Si                                                         | -0.002 | -0.017 | 0.000 | -0.019 | Si                                                         | 0.001  | 0.015  | 0.000 | 0.016  |
| Si                                                         | -0.000 | 0.008 | 0.000 | 0.008 | Si                                                         | 0.000  | -0.018 | 0.000 | -0.018 | Si                                                         | -0.000 | -0.003 | 0.000 | -0.003 |
| Si                                                         | -0.000 | 0.008 | 0.000 | 0.008 | Si                                                         | 0.000  | -0.018 | 0.000 | -0.018 | Si                                                         | -0.000 | -0.003 | 0.000 | -0.003 |
| Si                                                         | 0.001  | 0.031 | 0.000 | 0.032 | Si                                                         | -0.002 | -0.017 | 0.000 | -0.019 | Si                                                         | 0.001  | 0.015  | 0.000 | 0.016  |
| Si                                                         | 0.000  | 0.020 | 0.000 | 0.020 | Si                                                         | 0.001  | -0.007 | 0.000 | -0.007 | Si                                                         | 0.001  | 0.000  | 0.000 | 0.002  |
| Si                                                         | 0.000  | 0.020 | 0.000 | 0.020 | Si                                                         | 0.001  | -0.008 | 0.000 | -0.007 | Si                                                         | 0.001  | 0.000  | 0.000 | 0.002  |
| Si                                                         | -0.000 | 0.006 | 0.000 | 0.006 | Si                                                         | 0.001  | -0.008 | 0.000 | -0.007 | Si                                                         | 0.001  | -0.005 | 0.000 | -0.004 |
| Si                                                         | 0.000  | 0.028 | 0.000 | 0.028 | Si                                                         | -0.000 | -0.003 | 0.000 | -0.003 | Si                                                         | 0.002  | 0.016  | 0.000 | 0.017  |
| Si                                                         | 0.000  | 0.028 | 0.000 | 0.028 | Si                                                         | -0.000 | -0.002 | 0.000 | -0.003 | Si                                                         | 0.002  | 0.016  | 0.000 | 0.017  |

|                                                              |        |        |        |        |                                                              |        |        |       |        |                                                              |        |        |        |        |        |
|--------------------------------------------------------------|--------|--------|--------|--------|--------------------------------------------------------------|--------|--------|-------|--------|--------------------------------------------------------------|--------|--------|--------|--------|--------|
| Si                                                           | -0.001 | 0.005  | 0.000  | 0.005  | Si                                                           | 0.001  | -0.007 | 0.000 | -0.007 | Si                                                           | 0.001  | -0.005 | 0.000  | -0.004 |        |
| Si                                                           | -0.000 | 0.008  | 0.000  | 0.008  | Si                                                           | 0.000  | -0.018 | 0.000 | -0.018 | Si                                                           | -0.000 | -0.003 | 0.000  | -0.003 |        |
| Si                                                           | -0.000 | 0.008  | 0.000  | 0.008  | Si                                                           | 0.000  | -0.018 | 0.000 | -0.018 | Si                                                           | -0.000 | -0.003 | 0.000  | -0.003 |        |
| Si                                                           | 0.000  | 0.014  | 0.000  | 0.014  | Si                                                           | -0.002 | -0.017 | 0.000 | -0.019 | Si                                                           | 0.001  | 0.010  | 0.000  | 0.011  |        |
| Si                                                           | 0.001  | 0.032  | 0.000  | 0.033  | Si                                                           | -0.002 | -0.017 | 0.000 | -0.019 | Si                                                           | 0.001  | 0.015  | 0.000  | 0.016  |        |
| Si                                                           | 0.001  | 0.031  | 0.000  | 0.031  | Si                                                           | -0.002 | -0.017 | 0.000 | -0.019 | Si                                                           | 0.001  | 0.015  | 0.000  | 0.016  |        |
| Si                                                           | -0.000 | 0.014  | 0.000  | 0.014  | Si                                                           | -0.002 | -0.017 | 0.000 | -0.019 | Si                                                           | 0.001  | 0.010  | 0.000  | 0.011  |        |
| Si                                                           | 0.000  | 0.028  | 0.000  | 0.028  | Si                                                           | -0.000 | -0.003 | 0.000 | -0.003 | Si                                                           | 0.002  | 0.016  | 0.000  | 0.017  |        |
| Si                                                           | 0.000  | 0.028  | 0.000  | 0.028  | Si                                                           | -0.000 | -0.003 | 0.000 | -0.003 | Si                                                           | 0.002  | 0.016  | 0.000  | 0.017  |        |
| Si                                                           | 0.000  | 0.020  | 0.000  | 0.020  | Si                                                           | 0.001  | -0.007 | 0.000 | -0.007 | Si                                                           | 0.001  | 0.000  | 0.000  | 0.002  |        |
| Si                                                           | -0.001 | 0.005  | 0.000  | 0.005  | Si                                                           | 0.001  | -0.007 | 0.000 | -0.007 | Si                                                           | 0.001  | -0.005 | 0.000  | -0.004 |        |
| Si                                                           | -0.000 | 0.006  | 0.000  | 0.005  | Si                                                           | 0.001  | -0.008 | 0.000 | -0.007 | Si                                                           | 0.001  | -0.005 | 0.000  | -0.004 |        |
| Si                                                           | 0.000  | 0.020  | 0.000  | 0.020  | Si                                                           | 0.001  | -0.008 | 0.000 | -0.007 | Si                                                           | 0.001  | 0.000  | 0.000  | 0.002  |        |
| Cr                                                           | 0.001  | -0.001 | 0.115  | 0.115  | Mn                                                           | 0.012  | 0.010  | 1.883 | 1.905  | Fe                                                           | 0.006  | 0.011  | 1.964  | 1.980  |        |
| Cr                                                           | 0.001  | -0.001 | 0.122  | 0.122  | Mn                                                           | 0.012  | 0.010  | 1.881 | 1.904  | Fe                                                           | 0.006  | 0.011  | 1.964  | 1.980  |        |
| Cr                                                           | 0.001  | -0.001 | 0.119  | 0.320  | Mn                                                           | 0.014  | 0.014  | 2.061 | 2.090  | Fe                                                           | 0.005  | 0.006  | 1.934  | 1.946  |        |
| Cr                                                           | 0.001  | -0.001 | 0.115  | 0.315  | Mn                                                           | 0.014  | 0.014  | 2.061 | 2.089  | Fe                                                           | 0.005  | 0.006  | 1.934  | 1.945  |        |
| -----                                                        |        |        |        |        | -----                                                        |        |        |       |        | -----                                                        |        |        |        |        |        |
| Total                                                        | 0.005  | 0.426  | 0.471  | 1.302  | Total                                                        | 0.048  | -0.233 | 7.887 | 7.701  | Total                                                        | 0.045  | 0.166  | 7.796  | 8.007  |        |
| <b>Magnetization of Si<sub>24</sub>Cr<sub>2</sub>:Type 2</b> |        |        |        |        | <b>Magnetization of Si<sub>24</sub>Mn<sub>2</sub>:Type 2</b> |        |        |       |        | <b>Magnetization of Si<sub>24</sub>Fe<sub>2</sub>:Type 2</b> |        |        |        |        |        |
| Atoms                                                        | s      | p      | d      | Total  | Atoms                                                        | s      | p      | d     | Total  | Atoms                                                        | s      | p      | d      | Total  |        |
| -----                                                        |        |        |        |        | -----                                                        |        |        |       |        | -----                                                        |        |        |        |        |        |
| Si                                                           | -0.000 | 0.000  | 0.000  | 0.000  | Si                                                           | 0.003  | 0.002  | 0.000 | 0.005  | Si                                                           | 0.005  | -0.008 | 0.000  | -0.003 |        |
| Si                                                           | -0.000 | -0.000 | 0.000  | -0.000 | Si                                                           | 0.011  | -0.005 | 0.000 | 0.006  | Si                                                           | 0.004  | 0.024  | 0.000  | 0.029  |        |
| Si                                                           | -0.000 | -0.000 | 0.000  | -0.000 | Si                                                           | 0.011  | -0.005 | 0.000 | 0.006  | Si                                                           | 0.004  | 0.024  | 0.000  | 0.029  |        |
| Si                                                           | -0.000 | -0.000 | 0.000  | -0.000 | Si                                                           | 0.003  | 0.002  | 0.000 | 0.005  | Si                                                           | 0.005  | -0.009 | 0.000  | -0.004 |        |
| Si                                                           | -0.000 | -0.000 | 0.000  | -0.000 | Si                                                           | 0.003  | 0.025  | 0.000 | 0.028  | Si                                                           | -0.003 | -0.047 | 0.000  | -0.050 |        |
| Si                                                           | -0.000 | 0.000  | 0.000  | -0.000 | Si                                                           | 0.003  | 0.025  | 0.000 | 0.028  | Si                                                           | -0.003 | -0.047 | 0.000  | -0.050 |        |
| Si                                                           | 0.000  | 0.000  | 0.000  | 0.000  | Si                                                           | 0.003  | 0.002  | 0.000 | 0.005  | Si                                                           | 0.005  | -0.008 | 0.000  | -0.003 |        |
| Si                                                           | -0.000 | -0.000 | 0.000  | -0.000 | Si                                                           | 0.011  | -0.005 | 0.000 | 0.006  | Si                                                           | 0.004  | 0.024  | 0.000  | 0.029  |        |
| Si                                                           | 0.000  | 0.000  | 0.000  | 0.000  | Si                                                           | 0.003  | 0.002  | 0.000 | 0.005  | Si                                                           | 0.005  | -0.009 | 0.000  | -0.004 |        |
| Si                                                           | -0.000 | 0.000  | 0.000  | 0.000  | Si                                                           | 0.011  | -0.005 | 0.000 | 0.006  | Si                                                           | -0.003 | -0.046 | 0.000  | -0.050 |        |
| Si                                                           | -0.000 | -0.000 | 0.000  | -0.000 | Si                                                           | 0.003  | 0.025  | 0.000 | 0.028  | Si                                                           | -0.003 | -0.047 | 0.000  | -0.050 |        |
| Si                                                           | -0.000 | 0.000  | 0.000  | -0.000 | Si                                                           | 0.003  | 0.024  | 0.000 | 0.028  | Si                                                           | 0.004  | 0.024  | 0.000  | 0.029  |        |
| Si                                                           | -0.000 | 0.000  | 0.000  | -0.000 | Si                                                           | 0.011  | -0.005 | 0.000 | 0.006  | Si                                                           | 0.005  | -0.009 | 0.000  | -0.004 |        |
| Si                                                           | -0.000 | 0.000  | 0.000  | 0.000  | Si                                                           | 0.003  | 0.002  | 0.000 | 0.005  | Si                                                           | 0.000  | 0.025  | 0.000  | 0.025  |        |
| Si                                                           | -0.000 | -0.000 | 0.000  | -0.000 | Si                                                           | 0.011  | -0.005 | 0.000 | 0.006  | Si                                                           | 0.003  | 0.001  | 0.000  | 0.004  |        |
| Si                                                           | -0.000 | 0.000  | 0.000  | 0.000  | Si                                                           | 0.003  | 0.002  | 0.000 | 0.005  | Si                                                           | 0.000  | 0.025  | 0.000  | 0.025  |        |
| Si                                                           | -0.000 | -0.000 | 0.000  | -0.000 | Si                                                           | 0.011  | -0.005 | 0.000 | 0.006  | Si                                                           | 0.003  | 0.001  | 0.000  | 0.003  |        |
| Si                                                           | -0.000 | -0.000 | 0.000  | -0.000 | Si                                                           | 0.011  | -0.005 | 0.000 | 0.006  | Si                                                           | 0.003  | 0.000  | 0.000  | 0.003  |        |
| Si                                                           | 0.000  | 0.000  | 0.000  | 0.000  | Si                                                           | 0.003  | 0.002  | 0.000 | 0.005  | Si                                                           | 0.000  | 0.025  | 0.000  | 0.025  |        |
| Si                                                           | 0.000  | 0.000  | 0.000  | 0.000  | Si                                                           | 0.003  | 0.002  | 0.000 | 0.005  | Si                                                           | 0.000  | 0.025  | 0.000  | 0.025  |        |
| Si                                                           | -0.000 | -0.000 | 0.000  | -0.000 | Si                                                           | 0.011  | -0.005 | 0.000 | 0.006  | Si                                                           | 0.003  | 0.001  | 0.000  | 0.004  |        |
| Si                                                           | 0.000  | -0.000 | 0.000  | -0.000 | Si                                                           | 0.003  | 0.025  | 0.000 | 0.028  | Si                                                           | 0.001  | 0.001  | 0.000  | 0.002  |        |
| Si                                                           | -0.000 | -0.000 | 0.000  | -0.000 | Si                                                           | 0.003  | 0.024  | 0.000 | 0.028  | Si                                                           | 0.001  | 0.001  | 0.000  | 0.002  |        |
| Si                                                           | -0.000 | 0.000  | 0.000  | 0.000  | Si                                                           | 0.003  | 0.024  | 0.000 | 0.028  | Si                                                           | 0.001  | 0.001  | 0.000  | 0.002  |        |
| Si                                                           | -0.000 | -0.000 | 0.000  | -0.000 | Si                                                           | 0.003  | 0.025  | 0.000 | 0.028  | Si                                                           | 0.001  | 0.001  | 0.000  | 0.002  |        |
| Cr                                                           | 0.000  | -0.000 | 0.000  | 0.000  | Mn                                                           | 0.024  | 0.026  | 2.425 | 2.675  | Fe                                                           | -0.002 | -0.006 | -0.725 | -0.734 |        |
| Cr                                                           | 0.000  | -0.000 | -0.000 | -0.000 | Mn                                                           | 0.024  | 0.026  | 2.429 | 2.679  | Fe                                                           | -0.006 | -0.009 | -1.283 | -1.298 |        |
| -----                                                        |        |        |        |        | -----                                                        |        |        |       |        | -----                                                        |        |        |        |        |        |
| Total                                                        | -0.000 | -0.000 | 0.000  | 0.000  | Total                                                        | 0.188  | 0.226  | 4.855 | 5.868  | -                                                            | Total  | 0.031  | -0.034 | -2.008 | -2.012 |
| <b>Magnetization of Si<sub>30</sub>Cr<sub>2</sub>:Type 3</b> |        |        |        |        | <b>Magnetization of Si<sub>30</sub>Mn<sub>2</sub>:Type 3</b> |        |        |       |        | <b>Magnetization of Si<sub>30</sub>Fe<sub>2</sub>:Type 3</b> |        |        |        |        |        |
| Atoms                                                        | s      | p      | d      | Total  | Atoms                                                        | s      | p      | d     | Total  | Atoms                                                        | s      | p      | d      | Total  |        |
| -----                                                        |        |        |        |        | -----                                                        |        |        |       |        | -----                                                        |        |        |        |        |        |
| Si                                                           | -0.003 | 0.011  | 0.000  | 0.008  | Si                                                           | -0.006 | -0.013 | 0.000 | -0.019 | Si                                                           | 0.004  | -0.008 | 0.000  | -0.004 |        |

|                                                               |        |        |       |        |                                                               |        |        |       |        |                                                               |        |        |       |        |
|---------------------------------------------------------------|--------|--------|-------|--------|---------------------------------------------------------------|--------|--------|-------|--------|---------------------------------------------------------------|--------|--------|-------|--------|
| Si                                                            | -0.001 | -0.014 | 0.000 | -0.015 | Si                                                            | -0.004 | -0.015 | 0.000 | -0.019 | Si                                                            | -0.001 | -0.015 | 0.000 | -0.015 |
| Si                                                            | 0.003  | -0.004 | 0.000 | -0.000 | Si                                                            | 0.003  | 0.049  | 0.000 | 0.052  | Si                                                            | 0.006  | 0.077  | 0.000 | 0.083  |
| Si                                                            | 0.002  | -0.020 | 0.000 | -0.018 | Si                                                            | 0.003  | 0.045  | 0.000 | 0.048  | Si                                                            | 0.014  | 0.093  | 0.000 | 0.108  |
| Si                                                            | 0.003  | 0.012  | 0.000 | 0.015  | Si                                                            | 0.000  | -0.005 | 0.000 | -0.005 | Si                                                            | 0.004  | -0.014 | 0.000 | -0.010 |
| Si                                                            | 0.008  | 0.047  | 0.000 | 0.055  | Si                                                            | 0.004  | 0.050  | 0.000 | 0.054  | Si                                                            | 0.008  | 0.055  | 0.000 | 0.063  |
| Si                                                            | 0.003  | 0.012  | 0.000 | 0.015  | Si                                                            | 0.002  | -0.001 | 0.000 | 0.001  | Si                                                            | 0.000  | -0.007 | 0.000 | -0.007 |
| Si                                                            | 0.007  | 0.047  | 0.000 | 0.054  | Si                                                            | 0.005  | 0.046  | 0.000 | 0.051  | Si                                                            | 0.001  | 0.004  | 0.000 | 0.005  |
| Si                                                            | 0.005  | 0.009  | 0.000 | 0.014  | Si                                                            | 0.005  | 0.021  | 0.000 | 0.026  | Si                                                            | 0.003  | 0.026  | 0.000 | 0.029  |
| Si                                                            | 0.005  | 0.022  | 0.000 | 0.026  | Si                                                            | 0.007  | 0.014  | 0.000 | 0.020  | Si                                                            | 0.004  | 0.020  | 0.000 | 0.024  |
| Si                                                            | 0.008  | 0.072  | 0.000 | 0.081  | Si                                                            | 0.003  | 0.026  | 0.000 | 0.029  | Si                                                            | 0.002  | 0.006  | 0.000 | 0.008  |
| Si                                                            | 0.002  | 0.011  | 0.000 | 0.013  | Si                                                            | 0.002  | -0.016 | 0.000 | -0.014 | Si                                                            | 0.002  | 0.003  | 0.000 | 0.005  |
| Si                                                            | 0.010  | 0.017  | 0.000 | 0.026  | Si                                                            | 0.002  | 0.018  | 0.000 | 0.019  | Si                                                            | 0.006  | 0.023  | 0.000 | 0.030  |
| Si                                                            | -0.000 | 0.007  | 0.000 | 0.007  | Si                                                            | 0.002  | -0.017 | 0.000 | -0.015 | Si                                                            | 0.001  | -0.017 | 0.000 | -0.016 |
| Si                                                            | -0.000 | -0.009 | 0.000 | -0.010 | Si                                                            | -0.002 | -0.020 | 0.000 | -0.021 | Si                                                            | -0.000 | -0.011 | 0.000 | -0.011 |
| Si                                                            | 0.004  | -0.008 | 0.000 | -0.005 | Si                                                            | -0.007 | 0.005  | 0.000 | -0.002 | Si                                                            | 0.013  | 0.104  | 0.000 | 0.116  |
| Si                                                            | 0.002  | -0.003 | 0.000 | -0.002 | Si                                                            | -0.002 | -0.017 | 0.000 | -0.020 | Si                                                            | -0.001 | -0.019 | 0.000 | -0.020 |
| Si                                                            | 0.001  | -0.022 | 0.000 | -0.021 | Si                                                            | -0.003 | -0.000 | 0.000 | -0.004 | Si                                                            | -0.002 | 0.001  | 0.000 | -0.001 |
| Si                                                            | 0.006  | 0.045  | 0.000 | 0.052  | Si                                                            | 0.004  | 0.050  | 0.000 | 0.054  | Si                                                            | -0.001 | 0.005  | 0.000 | 0.004  |
| Si                                                            | 0.008  | 0.072  | 0.000 | 0.080  | Si                                                            | 0.005  | 0.044  | 0.000 | 0.049  | Si                                                            | 0.007  | 0.039  | 0.000 | 0.046  |
| Si                                                            | 0.005  | 0.009  | 0.000 | 0.014  | Si                                                            | 0.009  | 0.015  | 0.000 | 0.024  | Si                                                            | 0.004  | 0.047  | 0.000 | 0.051  |
| Si                                                            | 0.010  | 0.017  | 0.000 | 0.027  | Si                                                            | 0.006  | 0.020  | 0.000 | 0.026  | Si                                                            | 0.006  | 0.021  | 0.000 | 0.026  |
| Si                                                            | 0.002  | 0.010  | 0.000 | 0.012  | Si                                                            | 0.003  | -0.005 | 0.000 | -0.002 | Si                                                            | 0.003  | -0.024 | 0.000 | -0.021 |
| Si                                                            | -0.000 | -0.006 | 0.000 | -0.006 | Si                                                            | -0.004 | -0.020 | 0.000 | -0.023 | Si                                                            | 0.002  | -0.021 | 0.000 | -0.019 |
| Si                                                            | -0.001 | -0.012 | 0.000 | -0.013 | Si                                                            | -0.010 | -0.056 | 0.000 | -0.066 | Si                                                            | -0.001 | -0.005 | 0.000 | -0.006 |
| Si                                                            | 0.007  | 0.006  | 0.000 | 0.012  | Si                                                            | 0.004  | 0.004  | 0.000 | 0.008  | Si                                                            | 0.002  | 0.014  | 0.000 | 0.016  |
| Si                                                            | 0.004  | 0.008  | 0.000 | 0.012  | Si                                                            | 0.002  | 0.004  | 0.000 | 0.007  | Si                                                            | 0.001  | 0.015  | 0.000 | 0.016  |
| Si                                                            | 0.007  | 0.006  | 0.000 | 0.013  | Si                                                            | 0.002  | 0.014  | 0.000 | 0.017  | Si                                                            | 0.004  | 0.013  | 0.000 | 0.017  |
| Si                                                            | -0.000 | 0.011  | 0.000 | 0.011  | Si                                                            | 0.002  | 0.002  | 0.000 | 0.004  | Si                                                            | 0.002  | 0.010  | 0.000 | 0.012  |
| Si                                                            | 0.003  | 0.008  | 0.000 | 0.012  | Si                                                            | 0.003  | 0.004  | 0.000 | 0.007  | Si                                                            | 0.002  | 0.008  | 0.000 | 0.011  |
| Cr                                                            | 0.043  | 0.040  | 2.753 | 3.836  | Mn                                                            | 0.032  | 0.030  | 3.207 | 3.569  | Fe                                                            | 0.023  | 0.017  | 2.176 | 2.816  |
| Cr                                                            | 0.054  | 0.035  | 3.435 | 3.524  | Mn                                                            | 0.029  | 0.018  | 3.667 | 3.714  | Fe                                                            | 0.023  | 0.014  | 2.342 | 2.379  |
| -----                                                         |        |        |       |        | -----                                                         |        |        |       |        | -----                                                         |        |        |       |        |
| Total                                                         | 0.205  | 0.435  | 6.188 | 7.828  | Total                                                         | 0.102  | 0.293  | 6.874 | 7.569  | Total                                                         | 0.141  | 0.474  | 4.518 | 5.732  |
| <b>Magnetization of Si<sub>36</sub>Cr<sub>2</sub> :Type 4</b> |        |        |       |        | <b>Magnetization of Si<sub>36</sub>Mn<sub>2</sub> :Type 4</b> |        |        |       |        | <b>Magnetization of Si<sub>36</sub>Fe<sub>2</sub> :Type 4</b> |        |        |       |        |
| Atoms                                                         | s      | p      | d     | Total  | Atoms                                                         | s      | p      | d     | Total  | Atoms                                                         | s      | p      | d     | Total  |
| -----                                                         |        |        |       |        | -----                                                         |        |        |       |        | -----                                                         |        |        |       |        |
| Si                                                            | 0.007  | 0.033  | 0.000 | 0.040  | Si                                                            | 0.003  | 0.025  | 0.000 | 0.029  | Si                                                            | -0.005 | -0.029 | 0.000 | -0.034 |
| Si                                                            | -0.000 | -0.004 | 0.000 | -0.004 | Si                                                            | 0.000  | -0.002 | 0.000 | -0.002 | Si                                                            | -0.001 | -0.018 | 0.000 | -0.019 |
| Si                                                            | 0.007  | 0.033  | 0.000 | 0.040  | Si                                                            | 0.003  | 0.025  | 0.000 | 0.028  | Si                                                            | -0.002 | -0.012 | 0.000 | -0.014 |
| Si                                                            | 0.006  | 0.033  | 0.000 | 0.039  | Si                                                            | 0.003  | 0.025  | 0.000 | 0.028  | Si                                                            | -0.001 | -0.008 | 0.000 | -0.009 |
| Si                                                            | 0.000  | -0.003 | 0.000 | -0.003 | Si                                                            | -0.000 | -0.002 | 0.000 | -0.003 | Si                                                            | 0.000  | 0.006  | 0.000 | 0.006  |
| Si                                                            | 0.006  | 0.031  | 0.000 | 0.037  | Si                                                            | 0.003  | 0.025  | 0.000 | 0.028  | Si                                                            | 0.000  | 0.003  | 0.000 | 0.003  |
| Si                                                            | 0.000  | -0.004 | 0.000 | -0.004 | Si                                                            | -0.000 | -0.002 | 0.000 | -0.002 | Si                                                            | 0.002  | 0.009  | 0.000 | 0.011  |
| Si                                                            | 0.006  | 0.031  | 0.000 | 0.037  | Si                                                            | 0.005  | 0.032  | 0.000 | 0.037  | Si                                                            | 0.000  | 0.003  | 0.000 | 0.003  |
| Si                                                            | 0.003  | 0.019  | 0.000 | 0.022  | Si                                                            | 0.002  | 0.023  | 0.000 | 0.025  | Si                                                            | -0.000 | 0.003  | 0.000 | 0.002  |
| Si                                                            | 0.003  | 0.020  | 0.000 | 0.023  | Si                                                            | 0.001  | 0.021  | 0.000 | 0.022  | Si                                                            | -0.000 | 0.003  | 0.000 | 0.002  |
| Si                                                            | 0.006  | 0.032  | 0.000 | 0.038  | Si                                                            | 0.003  | 0.025  | 0.000 | 0.028  | Si                                                            | 0.000  | 0.005  | 0.000 | 0.006  |
| Si                                                            | 0.000  | -0.004 | 0.000 | -0.003 | Si                                                            | -0.000 | -0.002 | 0.000 | -0.002 | Si                                                            | -0.000 | -0.001 | 0.000 | -0.001 |
| Si                                                            | 0.003  | 0.020  | 0.000 | 0.022  | Si                                                            | 0.001  | 0.021  | 0.000 | 0.022  | Si                                                            | 0.001  | 0.007  | 0.000 | 0.008  |
| Si                                                            | 0.000  | -0.004 | 0.000 | -0.003 | Si                                                            | 0.000  | -0.002 | 0.000 | -0.002 | Si                                                            | 0.000  | 0.006  | 0.000 | 0.006  |
| Si                                                            | -0.000 | -0.004 | 0.000 | -0.004 | Si                                                            | -0.000 | -0.002 | 0.000 | -0.002 | Si                                                            | 0.000  | -0.008 | 0.000 | -0.008 |
| Si                                                            | 0.007  | 0.033  | 0.000 | 0.040  | Si                                                            | 0.003  | 0.025  | 0.000 | 0.028  | Si                                                            | -0.005 | -0.029 | 0.000 | -0.034 |
| Si                                                            | -0.000 | -0.004 | 0.000 | -0.004 | Si                                                            | 0.000  | -0.002 | 0.000 | -0.002 | Si                                                            | -0.003 | -0.022 | 0.000 | -0.025 |
| Si                                                            | 0.007  | 0.034  | 0.000 | 0.040  | Si                                                            | 0.005  | 0.034  | 0.000 | 0.039  | Si                                                            | -0.002 | -0.012 | 0.000 | -0.014 |
| Si                                                            | 0.006  | 0.032  | 0.000 | 0.038  | Si                                                            | 0.005  | 0.034  | 0.000 | 0.039  | Si                                                            | 0.003  | 0.012  | 0.000 | 0.016  |
| Si                                                            | 0.006  | 0.032  | 0.000 | 0.038  | Si                                                            | 0.003  | 0.025  | 0.000 | 0.029  | Si                                                            | 0.004  | 0.012  | 0.000 | 0.016  |

|       |        |        |       |        |       |        |        |       |        |       |        |        |       |        |
|-------|--------|--------|-------|--------|-------|--------|--------|-------|--------|-------|--------|--------|-------|--------|
| Si    | 0.003  | 0.019  | 0.000 | 0.022  | Si    | 0.002  | 0.023  | 0.000 | 0.025  | Si    | -0.001 | 0.008  | 0.000 | 0.007  |
| Si    | 0.003  | 0.020  | 0.000 | 0.022  | Si    | 0.001  | 0.021  | 0.000 | 0.022  | Si    | -0.001 | 0.008  | 0.000 | 0.007  |
| Si    | 0.000  | -0.004 | 0.000 | -0.003 | Si    | -0.000 | -0.002 | 0.000 | -0.003 | Si    | 0.003  | 0.018  | 0.000 | 0.021  |
| Si    | -0.000 | -0.004 | 0.000 | -0.004 | Si    | -0.000 | -0.002 | 0.000 | -0.003 | Si    | -0.004 | -0.053 | 0.000 | -0.058 |
| Si    | -0.000 | -0.004 | 0.000 | -0.004 | Si    | -0.000 | -0.002 | 0.000 | -0.003 | Si    | -0.003 | -0.022 | 0.000 | -0.025 |
| Si    | -0.000 | 0.002  | 0.000 | 0.002  | Si    | 0.002  | 0.007  | 0.000 | 0.009  | Si    | 0.000  | 0.006  | 0.000 | 0.006  |
| Si    | -0.000 | 0.002  | 0.000 | 0.002  | Si    | 0.002  | 0.010  | 0.000 | 0.011  | Si    | 0.001  | -0.000 | 0.000 | 0.000  |
| Si    | -0.000 | 0.002  | 0.000 | 0.002  | Si    | 0.001  | 0.010  | 0.000 | 0.011  | Si    | 0.003  | 0.013  | 0.000 | 0.016  |
| Si    | -0.000 | 0.002  | 0.000 | 0.002  | Si    | 0.002  | 0.007  | 0.000 | 0.009  | Si    | 0.003  | 0.013  | 0.000 | 0.016  |
| Si    | -0.000 | 0.002  | 0.000 | 0.002  | Si    | 0.001  | 0.010  | 0.000 | 0.011  | Si    | 0.002  | -0.001 | 0.000 | 0.001  |
| Si    | 0.003  | 0.019  | 0.000 | 0.022  | Si    | 0.001  | 0.021  | 0.000 | 0.022  | Si    | 0.001  | 0.007  | 0.000 | 0.008  |
| Si    | -0.000 | 0.002  | 0.000 | 0.002  | Si    | 0.002  | 0.010  | 0.000 | 0.011  | Si    | 0.000  | 0.006  | 0.000 | 0.006  |
| Si    | -0.000 | -0.004 | 0.000 | -0.004 | Si    | -0.000 | -0.002 | 0.000 | -0.002 | Si    | -0.001 | -0.018 | 0.000 | -0.018 |
| Si    | 0.006  | 0.033  | 0.000 | 0.039  | Si    | 0.005  | 0.032  | 0.000 | 0.037  | Si    | -0.001 | -0.008 | 0.000 | -0.009 |
| Si    | 0.000  | -0.004 | 0.000 | -0.003 | Si    | 0.000  | -0.002 | 0.000 | -0.002 | Si    | -0.000 | -0.001 | 0.000 | -0.001 |
| Si    | 0.006  | 0.032  | 0.000 | 0.038  | Si    | 0.003  | 0.026  | 0.000 | 0.029  | Si    | 0.001  | 0.005  | 0.000 | 0.006  |
| Cr    | 0.060  | 0.050  | 3.715 | 3.926  | Mn    | 0.049  | 0.031  | 3.629 | 3.709  | Fe    | 0.014  | 0.015  | 1.806 | 1.935  |
| Cr    | 0.051  | 0.049  | 3.693 | 3.893  | Mn    | 0.049  | 0.031  | 3.627 | 3.707  | Fe    | 0.019  | 0.010  | 2.235 | 2.164  |
| ----- |        |        |       |        | ----- |        |        |       |        | ----- |        |        |       |        |
| Total | 0.205  | 0.572  | 7.408 | 8.386  | Total | 0.162  | 0.551  | 7.256 | 7.969  | Total | 0.029  | -0.065 | 4.040 | 4.005  |



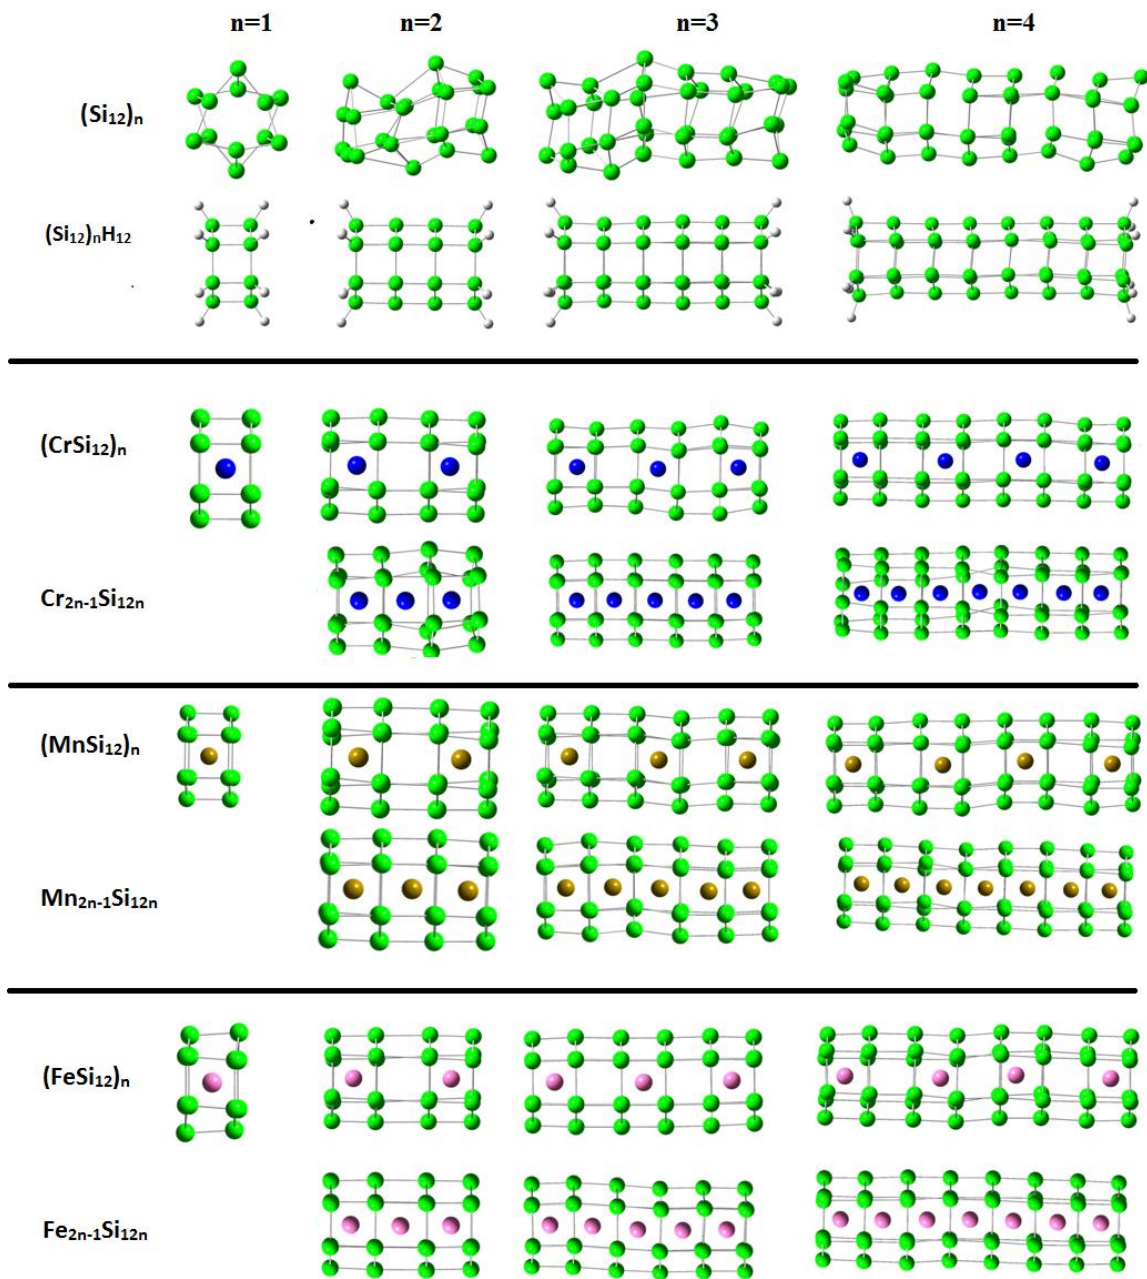

SI Fig. 1. Structures of hollow finite silicon nanotubes based on the most stable structures of empty  $\text{Si}_{12}$  and  $\text{Si}_{16}$  clusters as well as the effect of hydrogen termination and different transitional metal atom doping.

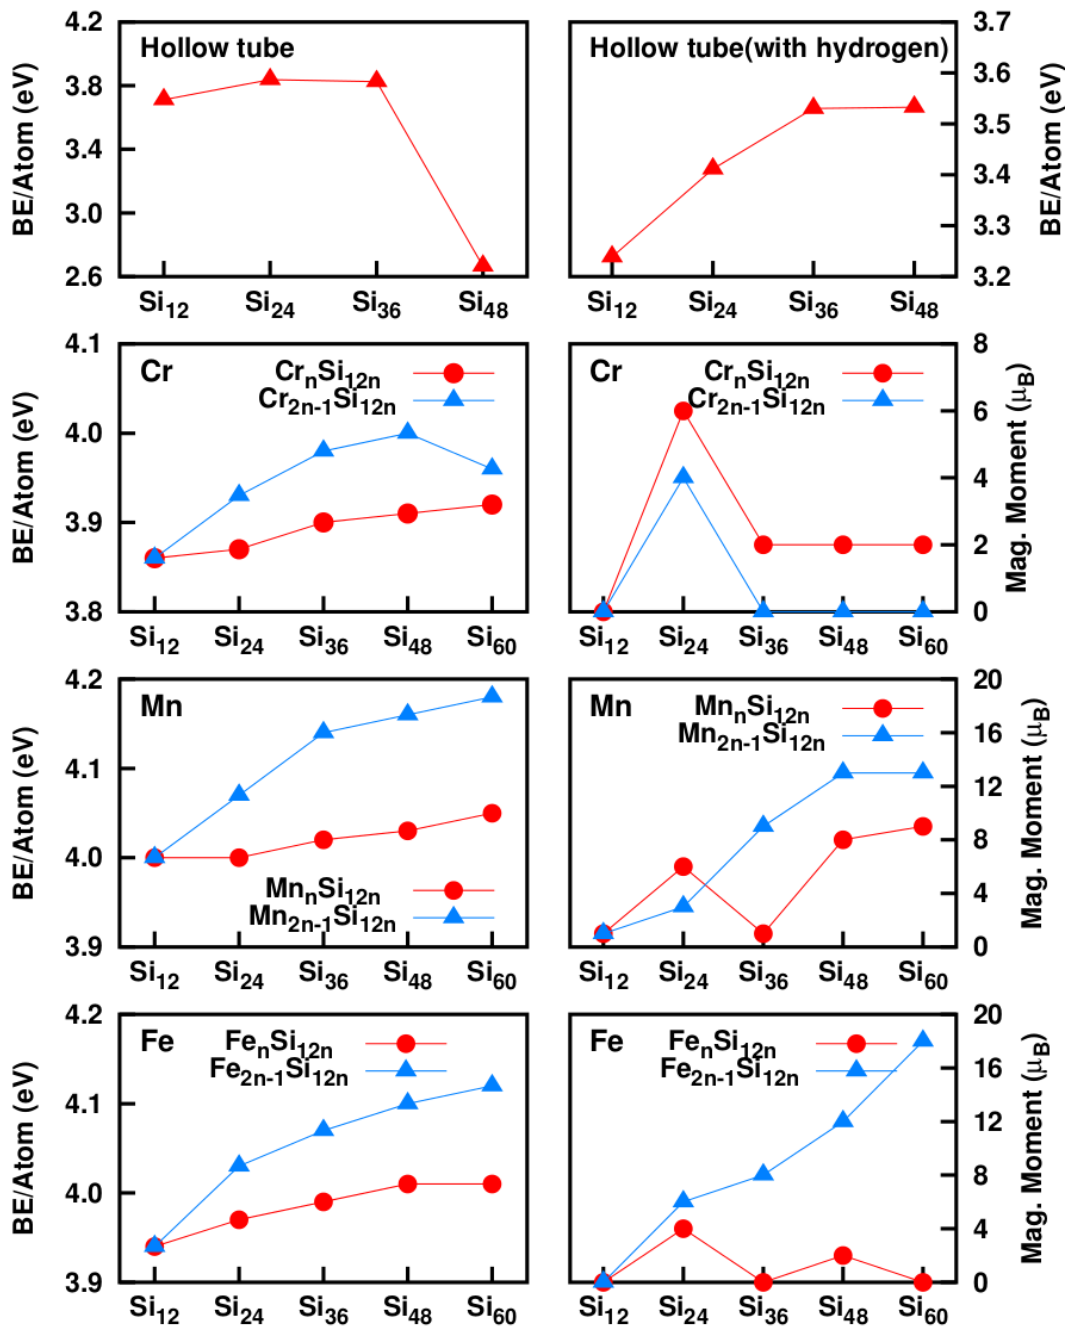

SI Fig. 2. Variation of average binding energy and corresponding magnetic moment of different  $TM_nSi_{12n}$  and  $TM_{2n-1}Si_{12n}$  cluster assemblies shown in SI Fig. 1, where, TM = Cr, Mn and Fe.

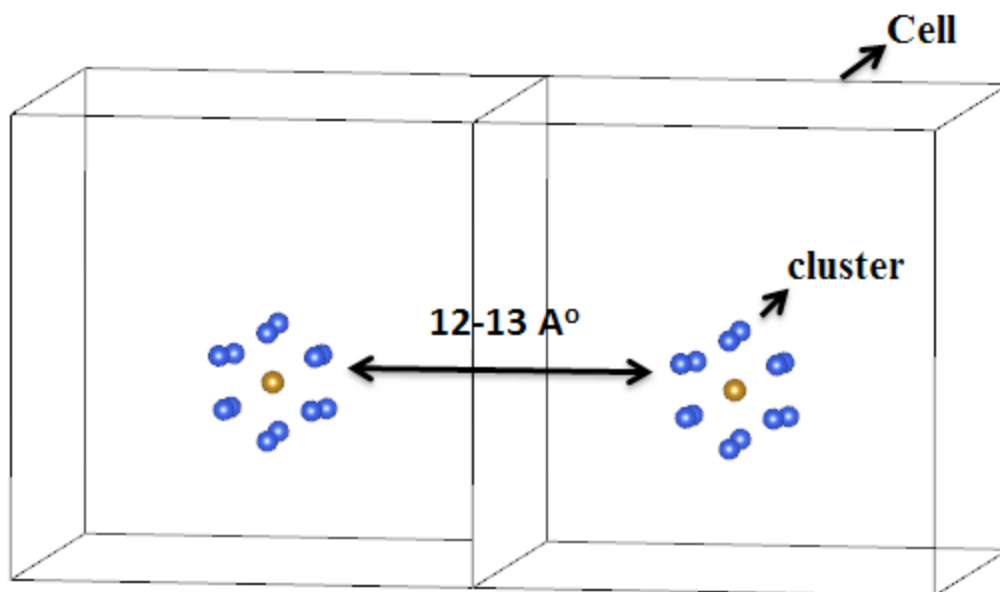

**SI Fig. 3.** Meaning of cluster and cell taken in the calculations based on the non-interacting system. Here each cluster is inside a cubic cell. We will get the actual picture if we extend the figure in all three (x-y-z) directions.

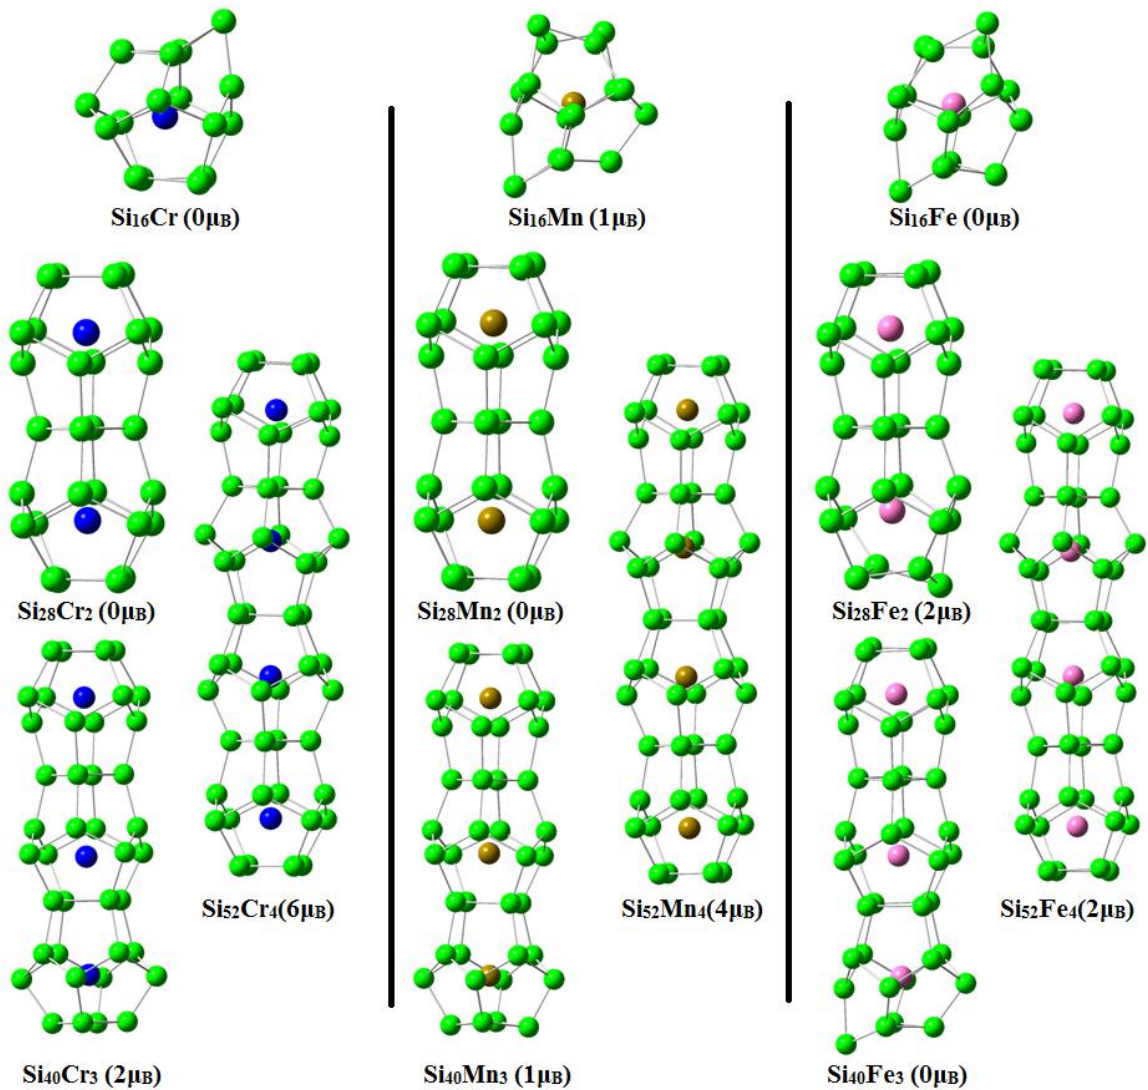

**SI Fig. 4.** Different TM-doped finite silicon nanotubes with  $\text{TMSi}_{16}$ ,  $\text{TM}_2\text{Si}_{28}$ ,  $\text{TM}_3\text{Si}_{40}$ ,  $\text{TM}_4\text{Si}_{52}$  (where,  $\text{TM}=\text{Cr}$ ,  $\text{Mn}$  and  $\text{Fe}$ ). Green, brown, blue and pink spheres are representing Si, Mn, Cr and Fe respectively.

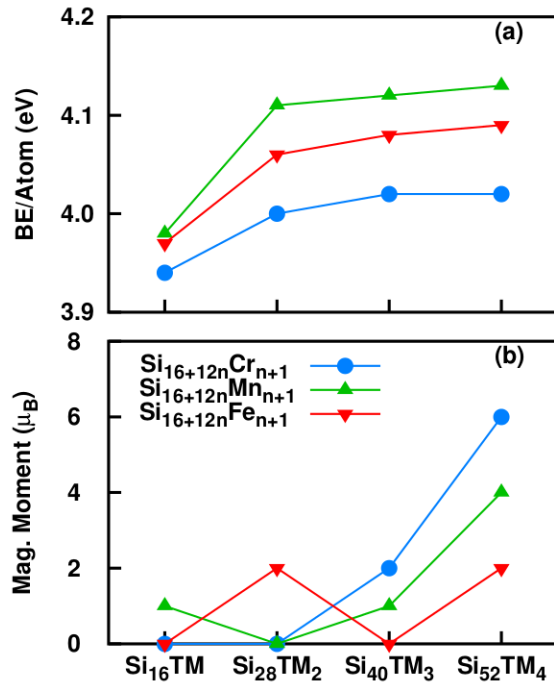

**SI Fig. 5.** Plots of (a) BE/atom and (b) magnetic moment versus different compositions of finite transition metal (TM= Cr,Mn and Fe) doped Type 2 silicon nanotubes.

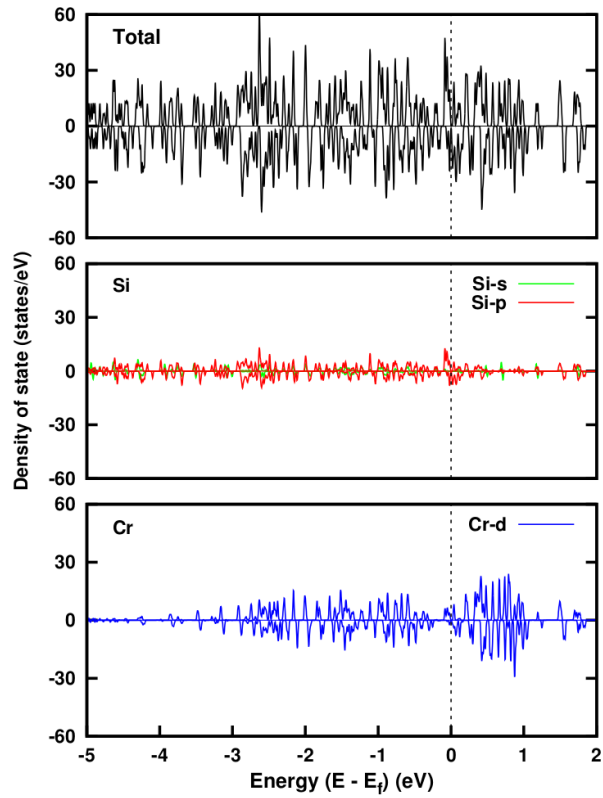

**SI Fig. 6a.** Variation of DOS and PDOS with energy near Fermi level for type 1  $(\text{Cr}_4\text{Si}_{24})_n$  infinite nanotubes.

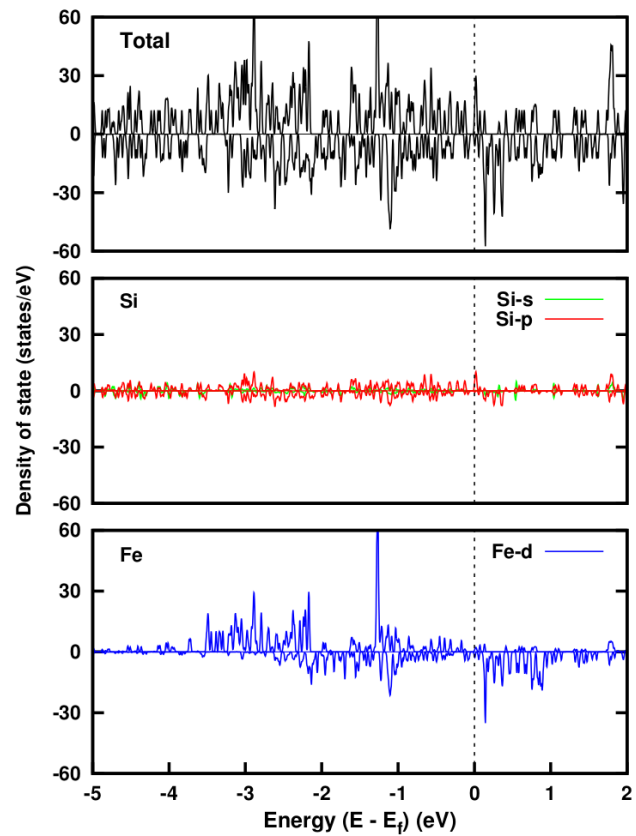

**SI Fig. 6b.** Variation of DOS and PDOS with energy near Fermi level for type 1 (Fe<sub>4</sub>Si<sub>24</sub>)<sub>n</sub> infinite nanotubes.

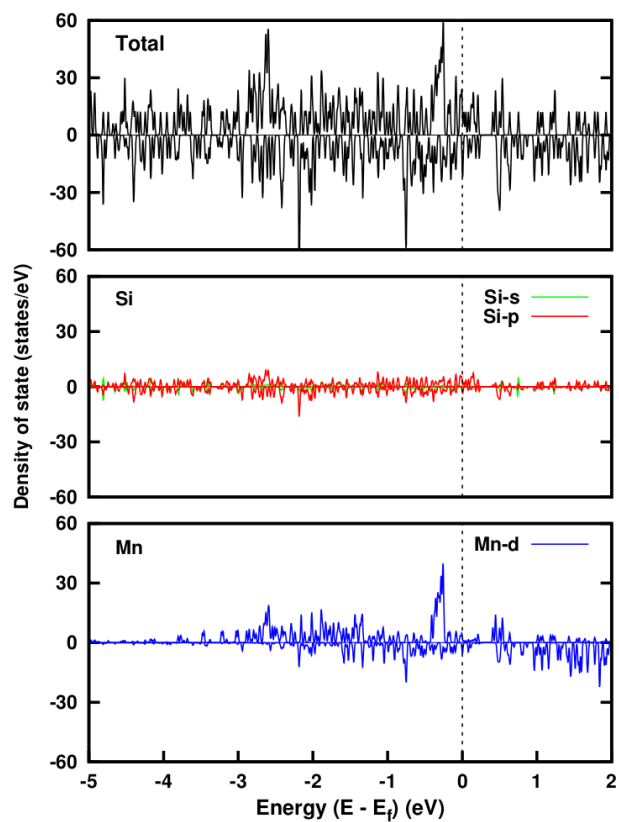

**SI Fig. 6c.** Variation of DOS and PDOS with energy near Fermi level for type 1  $(\text{Mn}_4\text{Si}_{24})_n$  infinite nanotubes.



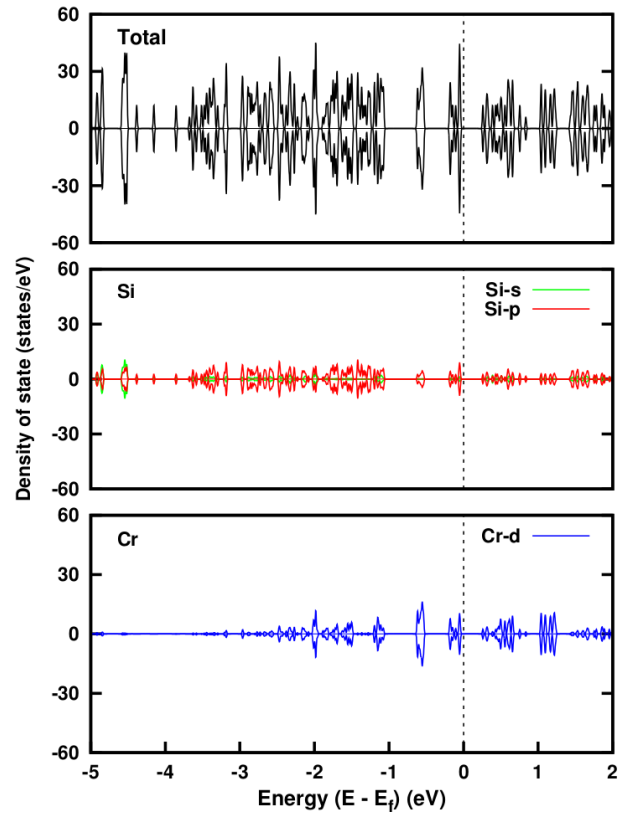

**SI Fig. 7a.** Variation of DOS and PDOS with energy near Fermi level for type 2  $(\text{Cr}_2\text{Si}_{24})_n$  infinite nanotubes.

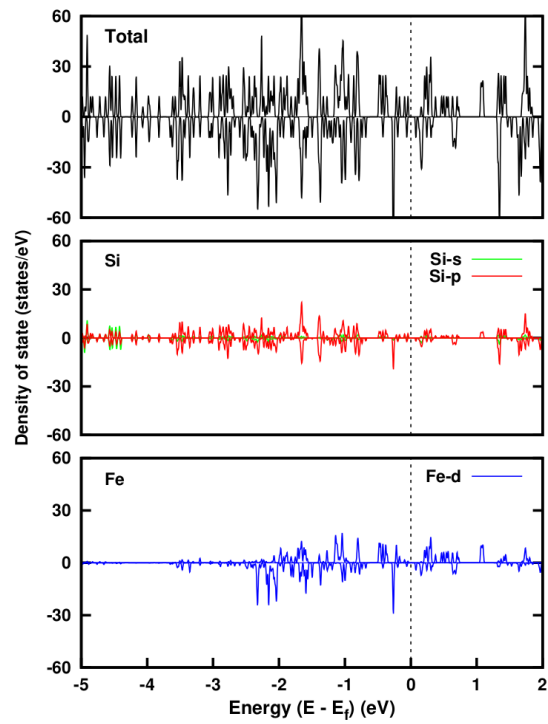

**SI Fig. 7b.** Variation of DOS and PDOS with energy near Fermi level for type 2  $(\text{Fe}_2\text{Si}_{24})_n$  infinite nanotubes.

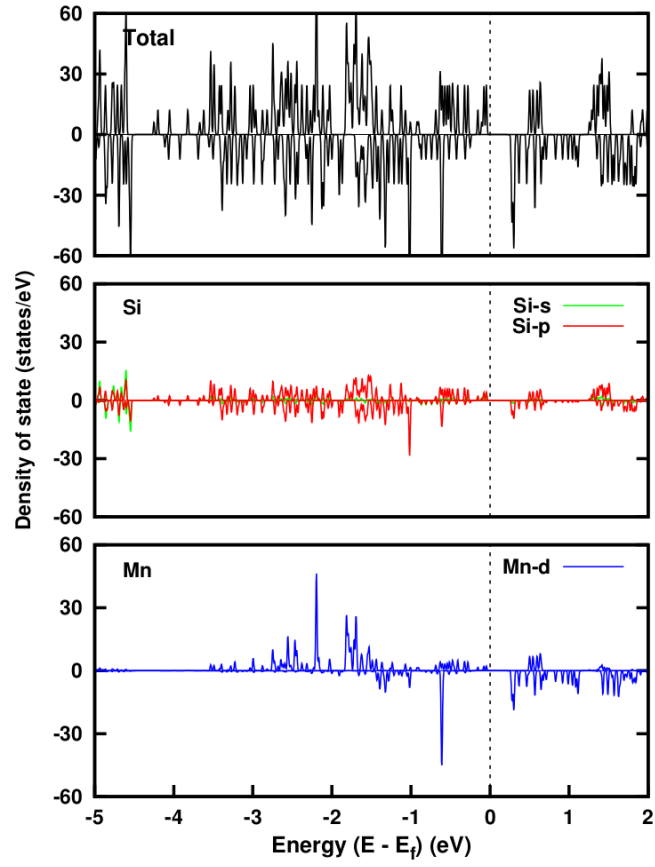

**SI Fig. 7c.** Variation of DOS and PDOS with energy near Fermi level for type 2  $(\text{Mn}_2\text{Si}_{24})_n$  infinite nanotubes.

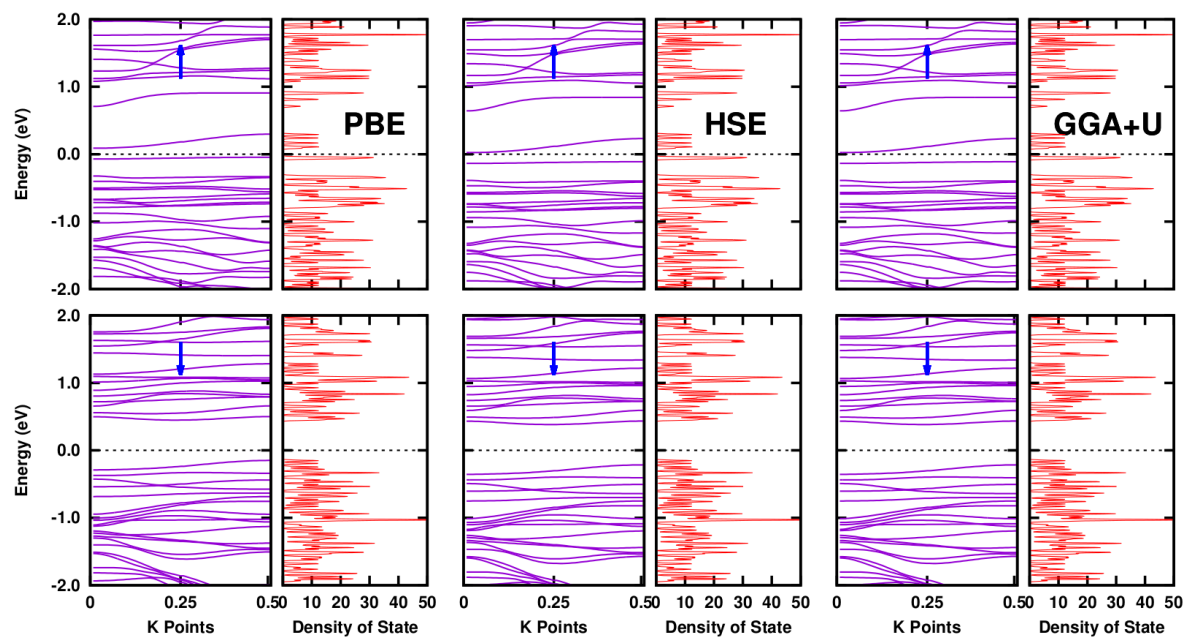

**SI Fig. 8.** Comparison of the band structure and DOS calculated using different approach as PBE, hybrid functional HSE and GGA+U in Mn doped Si Type 3 nanotube. It can be clearly seen that band gaps from each level of theory are almost same.

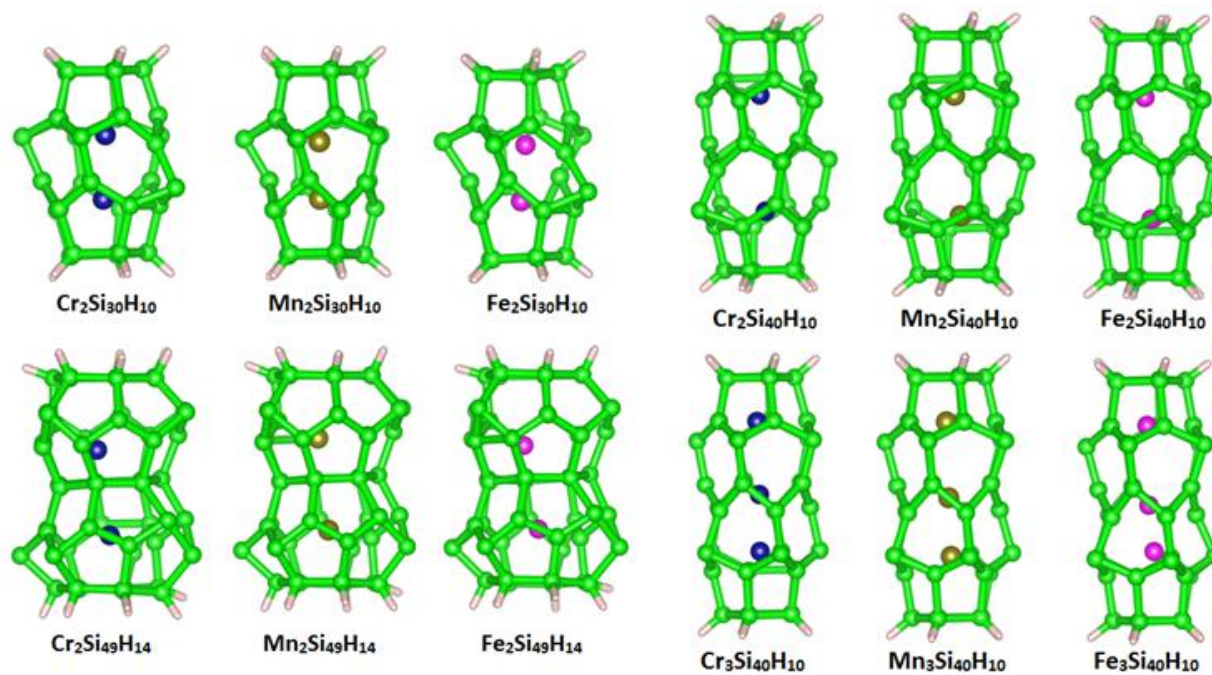

**SI Fig. 9.** Few more distorted structures.

Possibility of other nanotubes using the following units

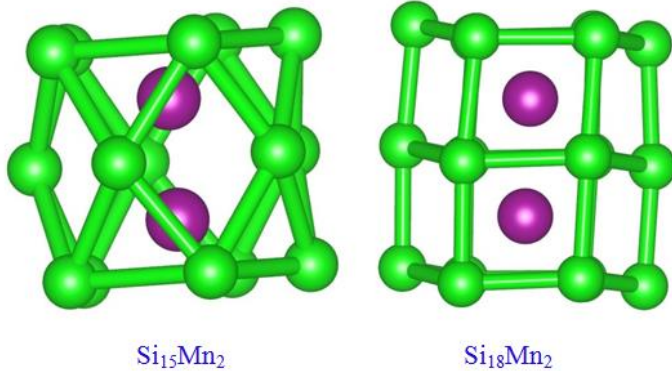

Now the question arises here, “Does the ground state isomer in a particular size only the suitable candidate for making cluster assembled materials (finite nanotube) or a nanotube or something else also involved here?” For that we have calculated Fukui function at each site as we have mentioned. Additionally, we have done the following exercise:

We agree with the reviewer that  $\text{Si}_{18}\text{Mn}_2$  ball structure is the minimum energy structure, but as we have mentioned earlier that cluster requires un-saturated bonds on the surface to make bigger sized material (assembled material).

To support this we have calculated BE/atom in four cases here

Average BE/atom of  $\text{Si}_{18}\text{Mn}_2$  ball structure = 4.11 eV

Average BE/atom of  $\text{Si}_{18}\text{Mn}_2$  tube structure = 4.04 eV

(Note that these two are the finite sized clusters, not in the infinite tube)

Average BE/atom of  $\text{Si}_{18}\text{Mn}_2\text{H}_{12}$  tube structure = 3.41 eV (Again note that it's the BE/atom included Hydrogen atoms in the clusters)

Average BE/atom of  $\text{Si}_{18}\text{Mn}_2$  in  $\text{Si}_{18}\text{Mn}_2\text{H}_{12}$  tube structure by terminating Hydrogen atom in the cluster (after saturate all the forces on both the two ends of the tube) = 4.23 eV

So this is the proof that the composition  $\text{Si}_{18}\text{Mn}_2$  holds tightly in the tube form rather than in a ball cluster structure.

The figure explanation is added below.

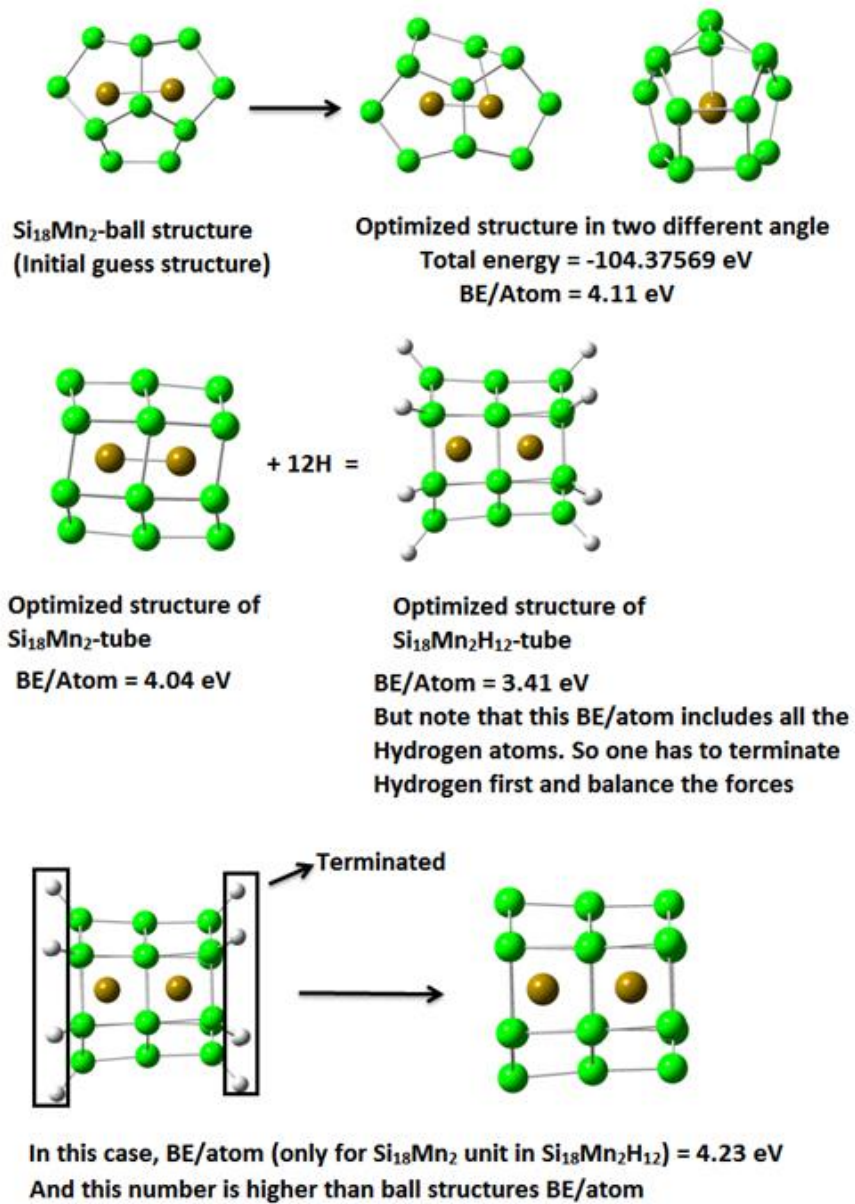

SI Fig.10. Pictorial representation of hydrogen termination effect on binding energies of the clusters

**Confirmation of stability: Study of IR spectrum and Free energy variation of the clusters with the increase of the cluster size as functionalized assembled materials as finite nanotubes**

In order to provide spectroscopic fingerprints of the finite nanotubes, as an example we have calculated the IR spectrum of Type 1 nanoclusters ( $\text{Si}_{12}\text{Cr}$ ,  $\text{Si}_{24}\text{Cr}_3$ ,  $\text{Si}_{36}\text{Cr}_5$  and  $\text{Si}_{12}\text{Fe}$ ,  $\text{Si}_{24}\text{Fe}_3$ ,  $\text{Si}_{36}\text{Fe}_5$ ) as shown in Figure 11 . For the Cr doping, the spectrum shows three prominent peaks at  $248\text{ cm}^{-1}$ ,  $260\text{ cm}^{-1}$  and  $275\text{ cm}^{-1}$  for  $\text{Si}_{12}\text{Cr}$ ,  $\text{Si}_{24}\text{Cr}_3$ ,  $\text{Si}_{36}\text{Cr}_5$  unites. Similarly for Fe doping, these pecks are  $270\text{ cm}^{-1}$ ,  $238\text{ cm}^{-1}$  and  $275\text{ cm}^{-1}$ . Using these vibration frequencies, we have also calculated the free energies including the vibrational entropies within the quasi-harmonic approximation (L. L. Boyer, Phys. Rev. Lett., 1979, 42, 584–587):

$$F(T) = E_0 + \frac{1}{2} \sum_i h\nu_i + k_B T \sum_i \ln \left[ 1 - e^{-\frac{h\nu_i}{k_B T}} \right]$$

where  $E_0$  is the total energy, and  $\nu_i$  are the vibrational frequencies of the clusters. In the figure below, we demonstrate the variation of free energy with temperature from 0 to 1000K. It can be clearly seen in Fig 2 that the adding functionalized units on the end of the tubes makes minimized the energy. This indicates the stability of the bigger sized units.

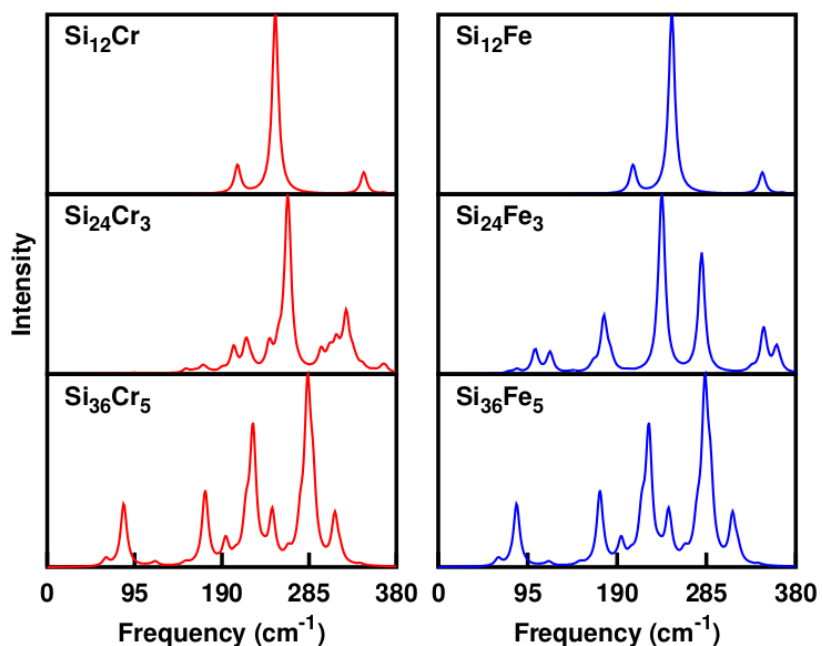

SI Fig 11. IR frequency variation of type 1 functionalized clusters assemblies.

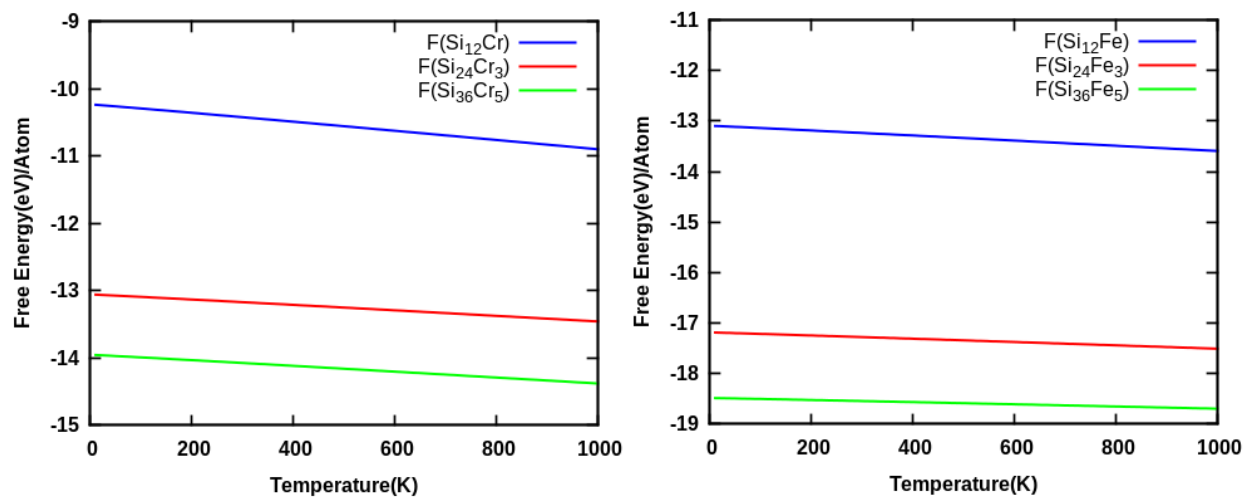

SI Fig. 12. Variation in free energies including the vibrational entropies within the quasi-harmonic approximation with temperature.
